# Supplementary material for: Reduced prediction error responses in high- as compared to low-uncertainty musical contexts
Source: bioRxiv or medRxiv preprint supplement (doi:10.1101/422949), 2019-06-13
Supplement: Supplementary file [file 422949-1.pdf]

## Supplementary materials 1

Stimuli used in the experiments and their corresponding Entropy and Information Content Profiles. Asterisks indicate the experiment in which they were used.

# LE major\*\*\*

mean IC = 1.16

mean entropy = 1.33

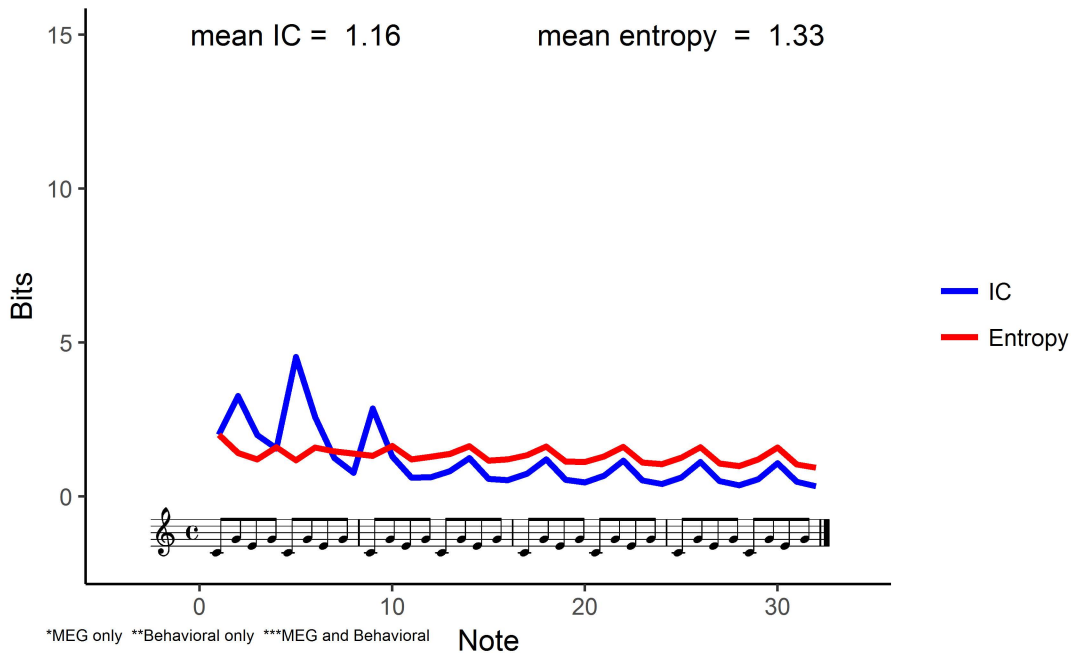

# LE minor\*

mean IC = 1.57

mean entropy = 1.12

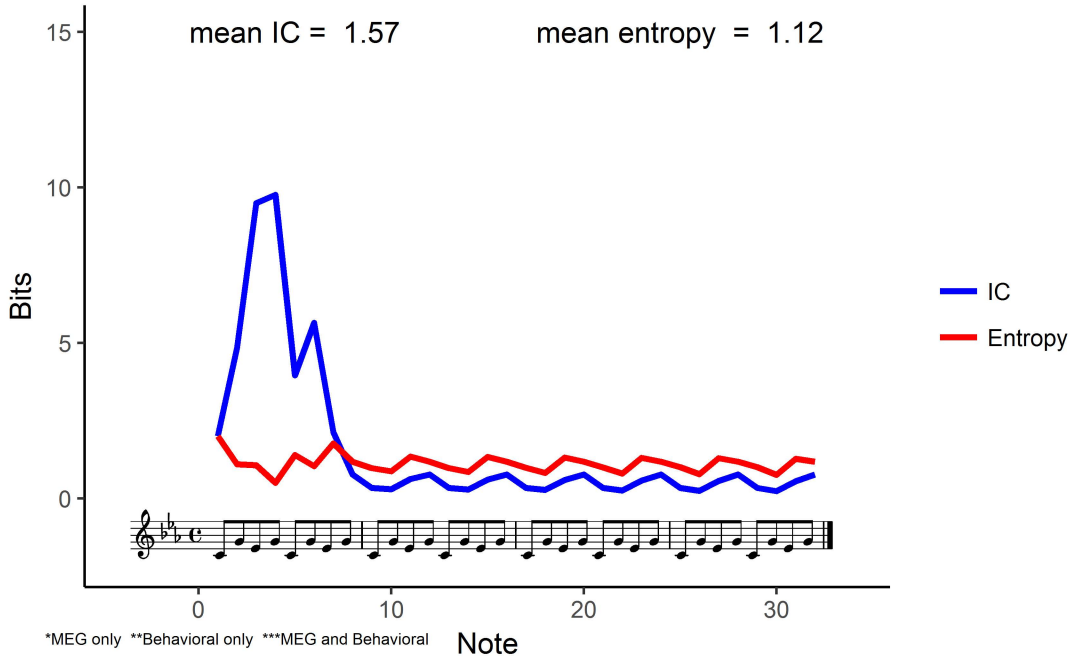

\*MEG only \*\*Behavioral only \*\*\*MEG and Behavioral

IE1\*\*

mean IC = 2.59

mean entropy = 2.01

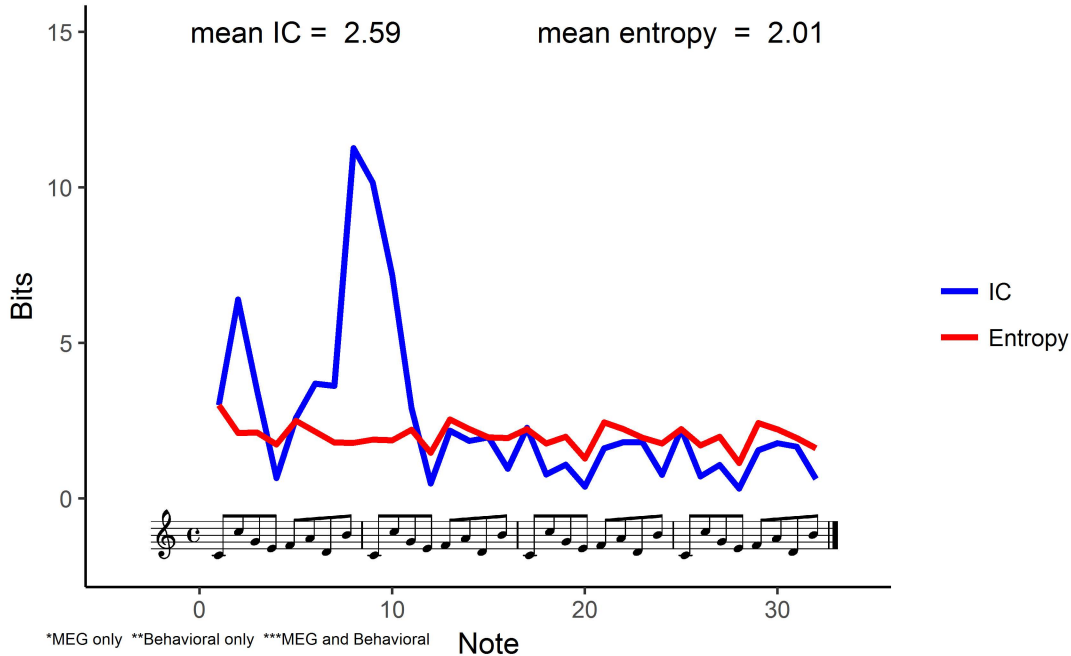

\*MEG only \*\*Behavioral only \*\*\*MEG and Behavioral

# IE2 1\*\*

mean IC = 2.67

mean entropy = 2.1

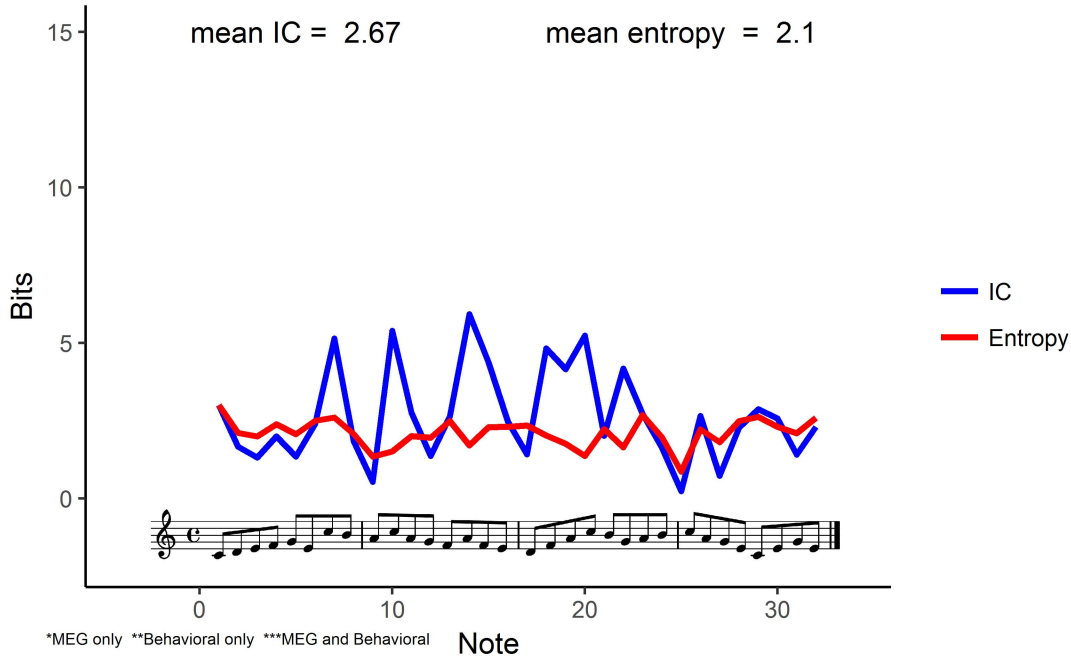

\*MEG only \*\*Behavioral only \*\*\*MEG and Behavioral

# IE2 2\*\*

mean IC = 2.92

mean entropy = 2.11

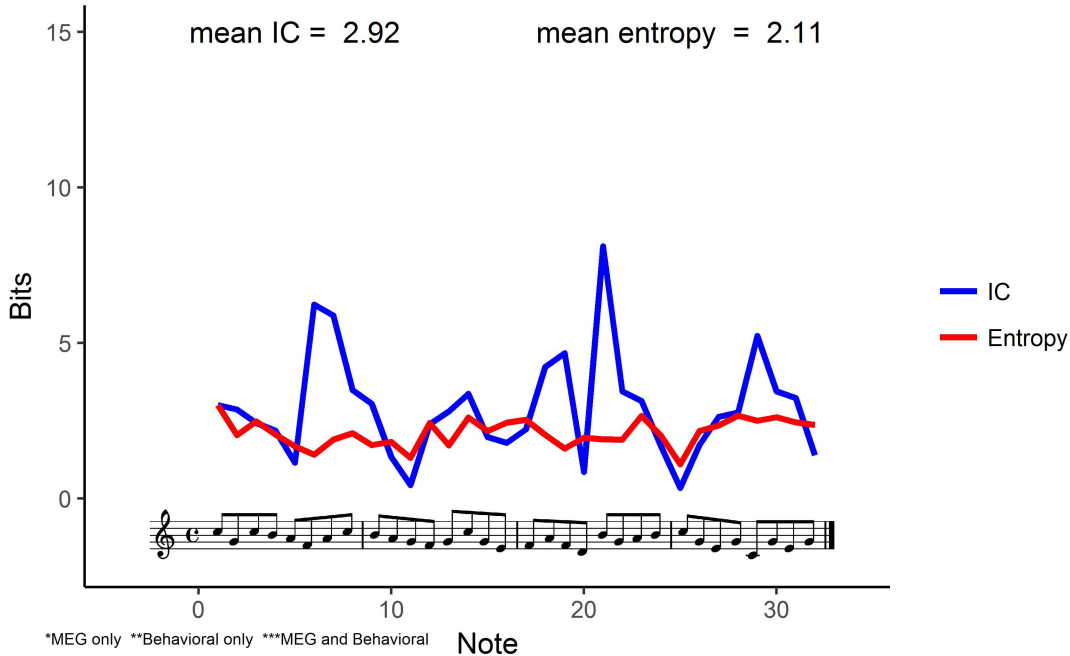

\*MEG only \*\*Behavioral only \*\*\*MEG and Behavioral

# IE2 3\*\*

mean IC = 2.53

mean entropy = 2.09

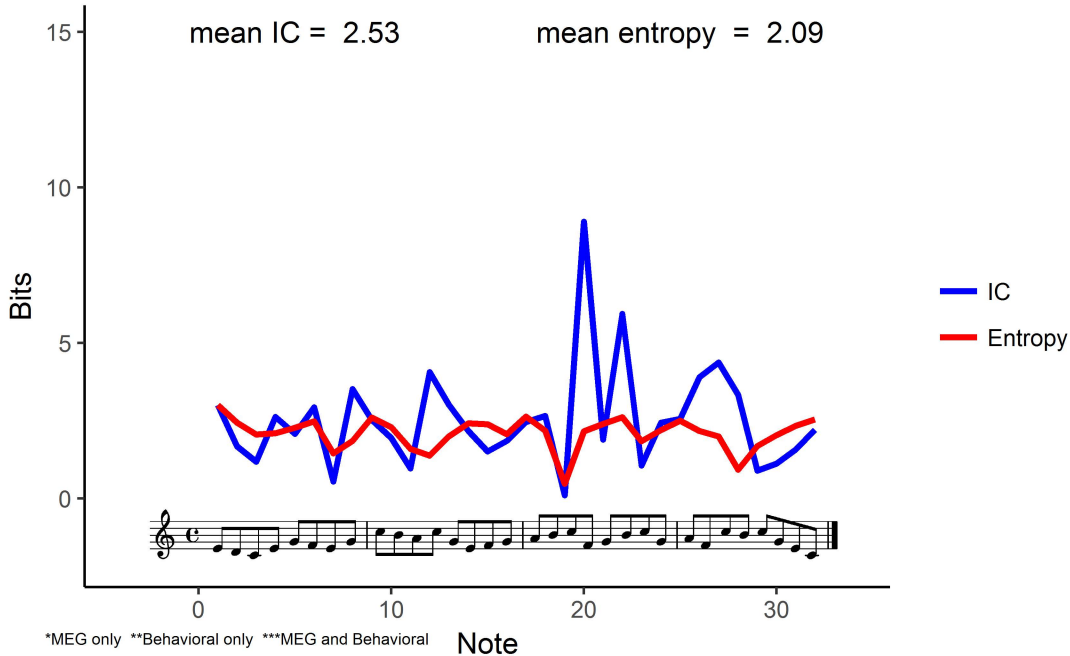

\*MEG only \*\*Behavioral only \*\*\*MEG and Behavioral

Note

# IE2 4\*\*

mean IC = 3.06

mean entropy = 2.16

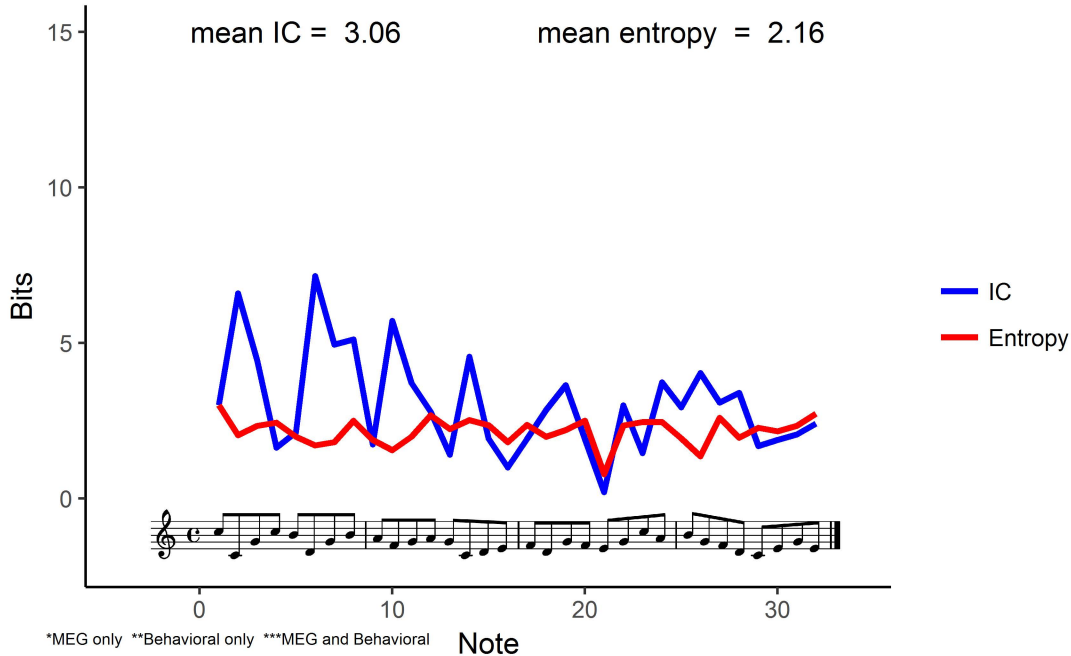

\*MEG only \*\*Behavioral only \*\*\*MEG and Behavioral



# IE2 5\*\*

mean IC = 2.59

mean entropy = 2.03

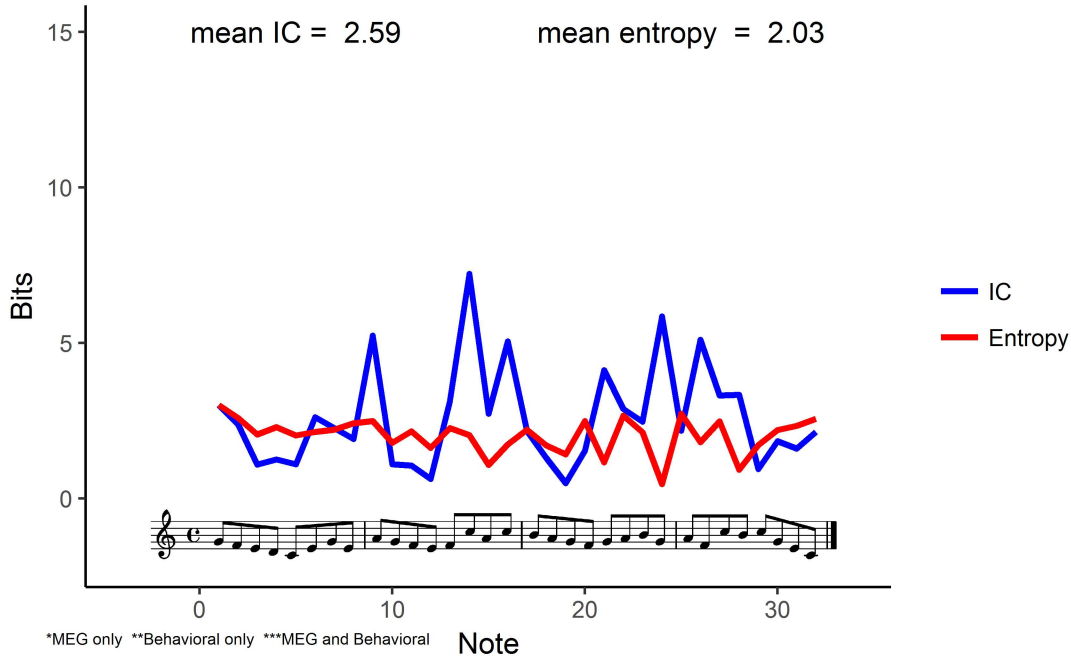

\*MEG only \*\*Behavioral only \*\*\*MEG and Behavioral

# IE3 1\*\*

mean IC = 4.33

mean entropy = 2.13

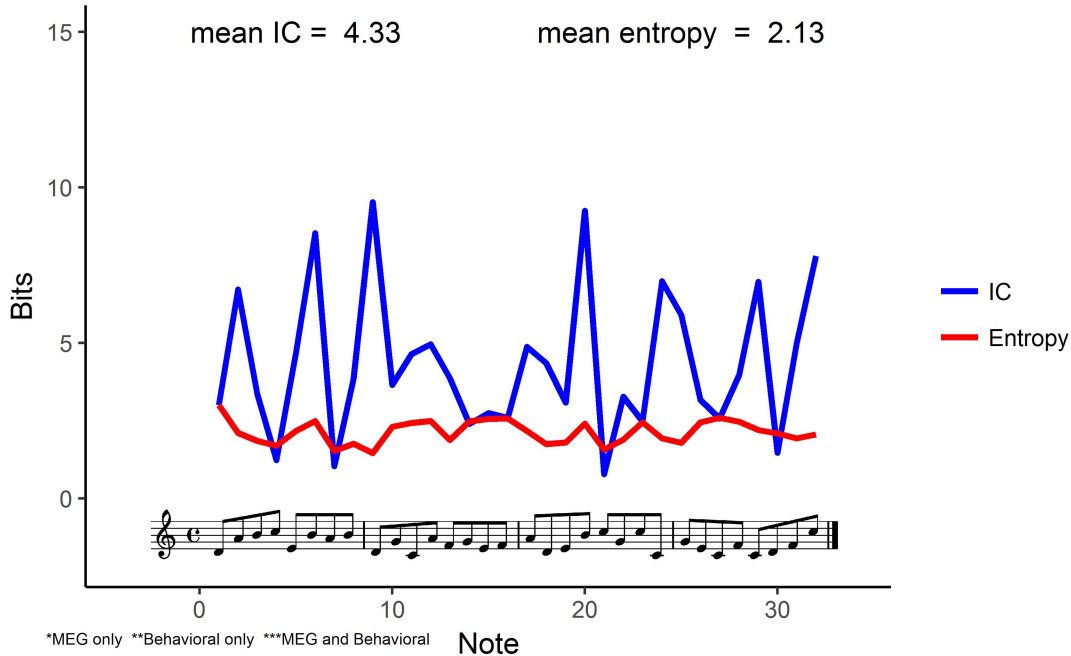

\*MEG only \*\*Behavioral only \*\*\*MEG and Behavioral

Note

# IE3 2\*\*

mean IC = 4.69

mean entropy = 2.14

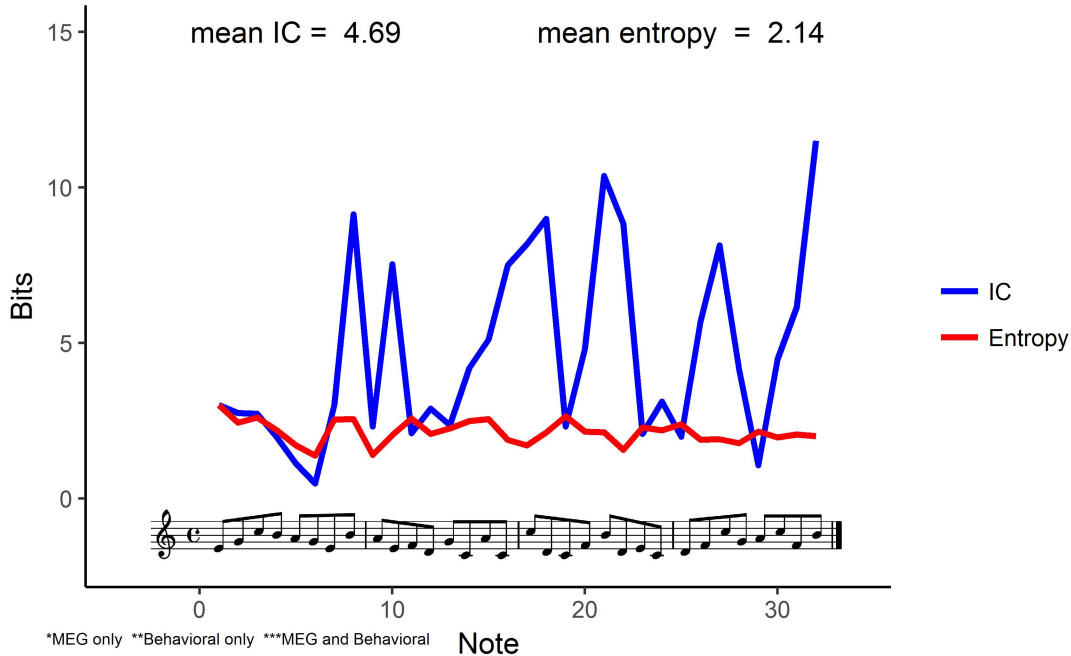

# IE3 3\*\*

mean IC = 4.92

mean entropy = 2.1

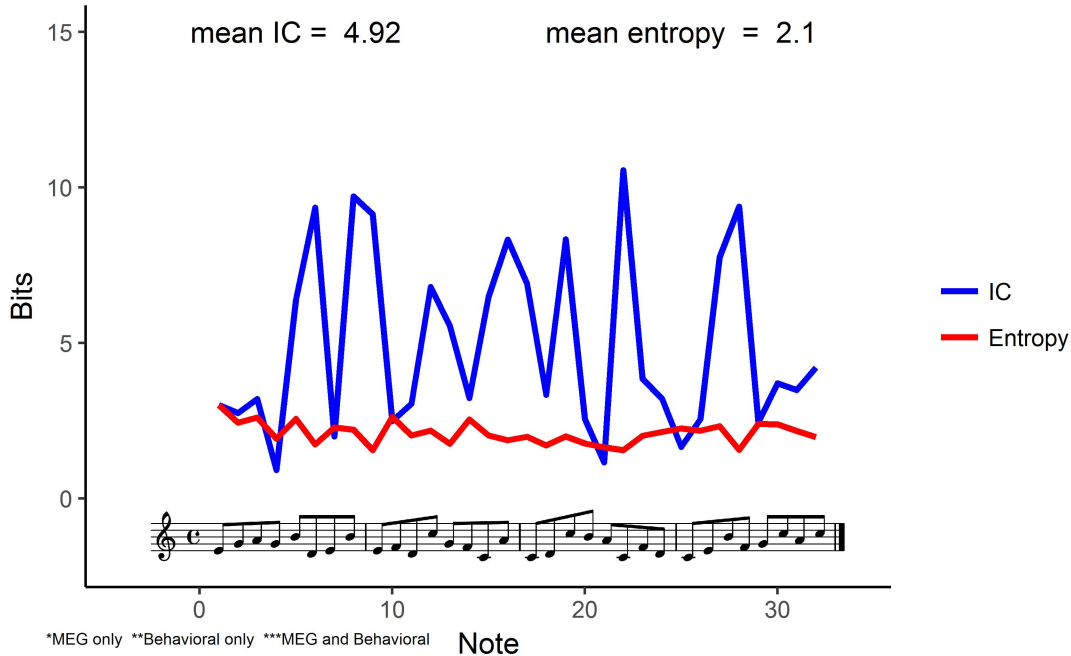

# IE3 4\*\*

mean IC = 4.23

mean entropy = 2.13

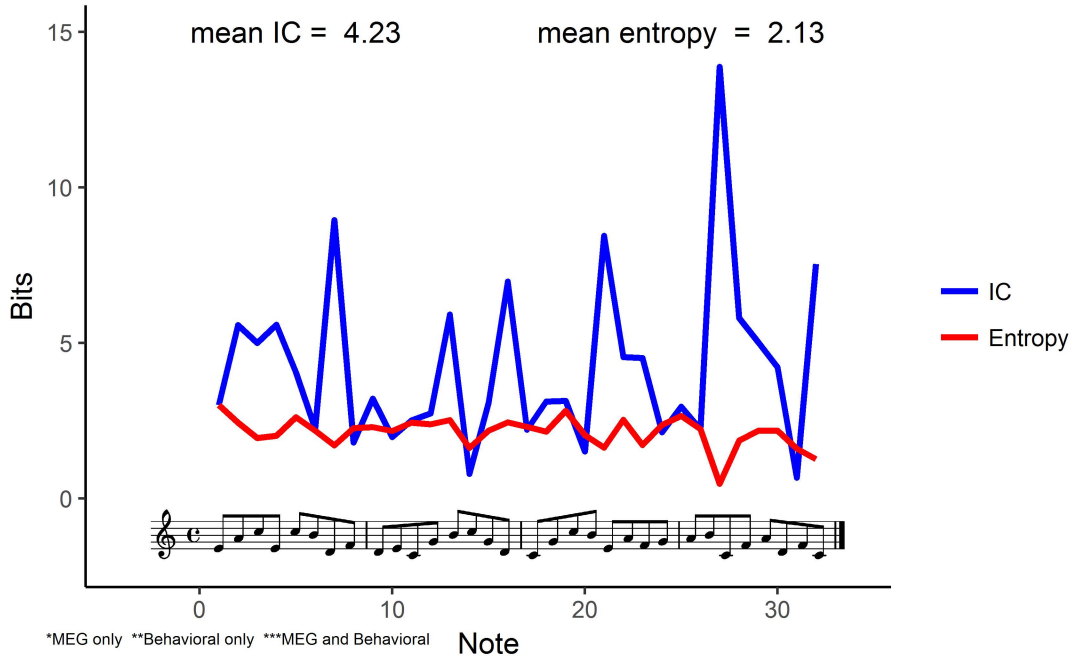

\*MEG only \*\*Behavioral only \*\*\*MEG and Behavioral

Note

# IE3 5\*\*

mean IC = 4.95

mean entropy = 2.08

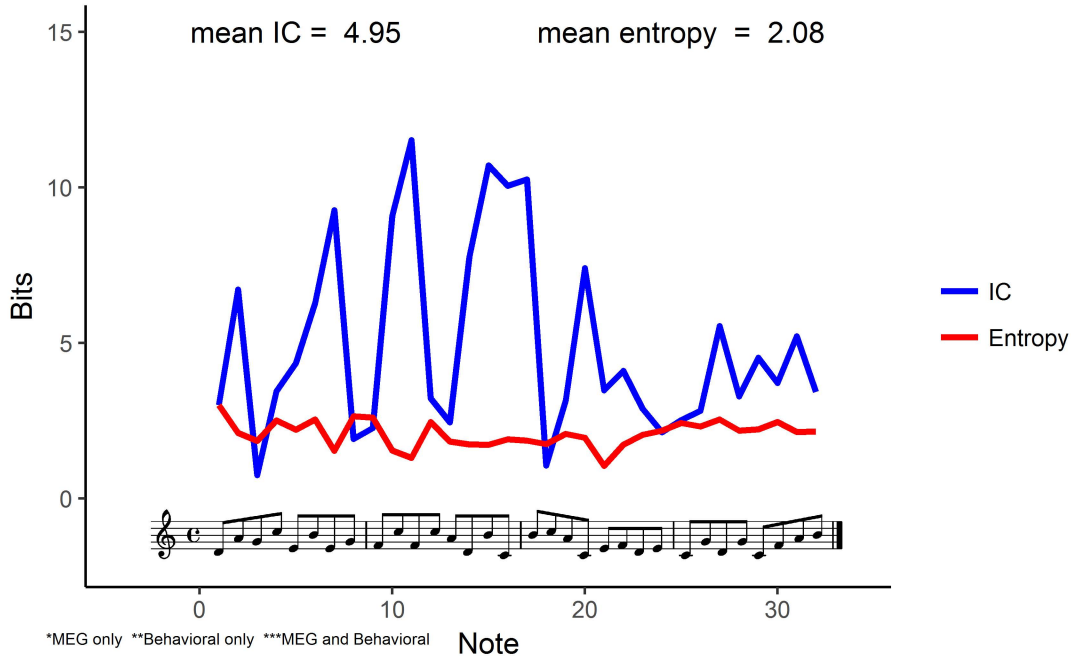

\*MEG only \*\*Behavioral only \*\*\*MEG and Behavioral

Note

# IE3 6\*\*

mean IC = 5.51

mean entropy = 2.05

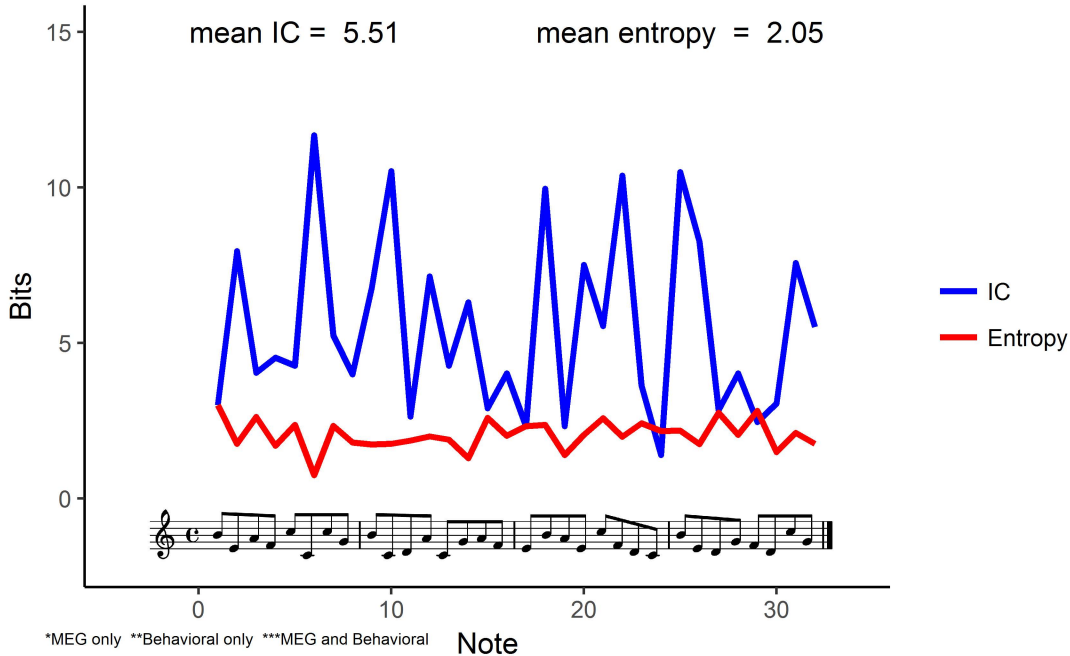

\*MEG only \*\*Behavioral only \*\*\*MEG and Behavioral

# IE3 7\*\*

mean IC = 4.69

mean entropy = 2.15

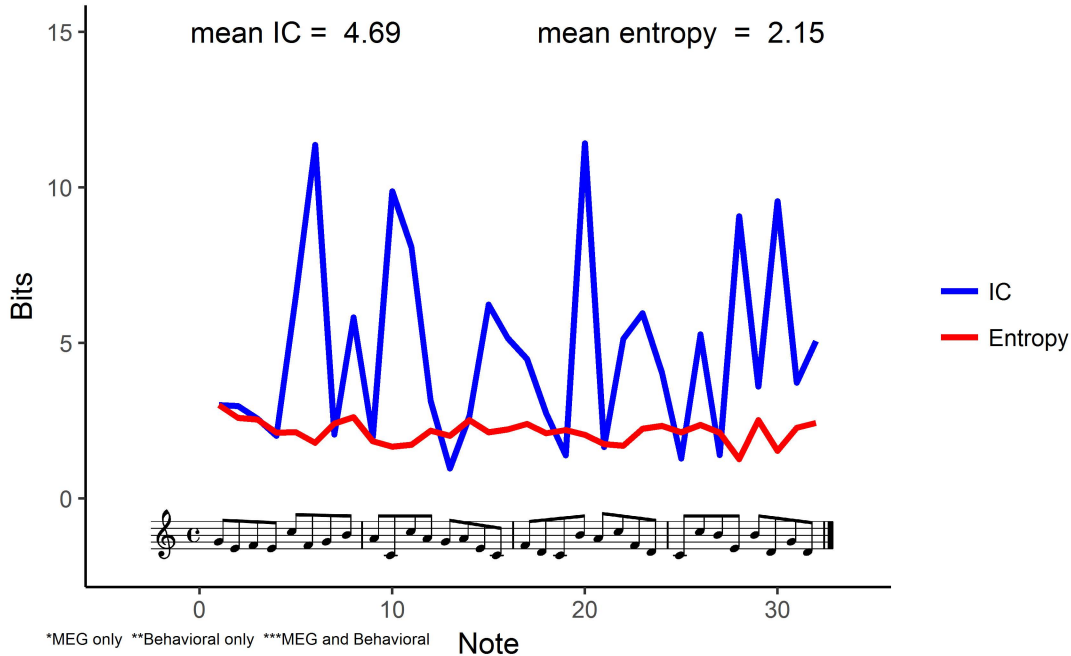



# IE3 8\*\*

mean IC = 5.08

mean entropy = 2.12

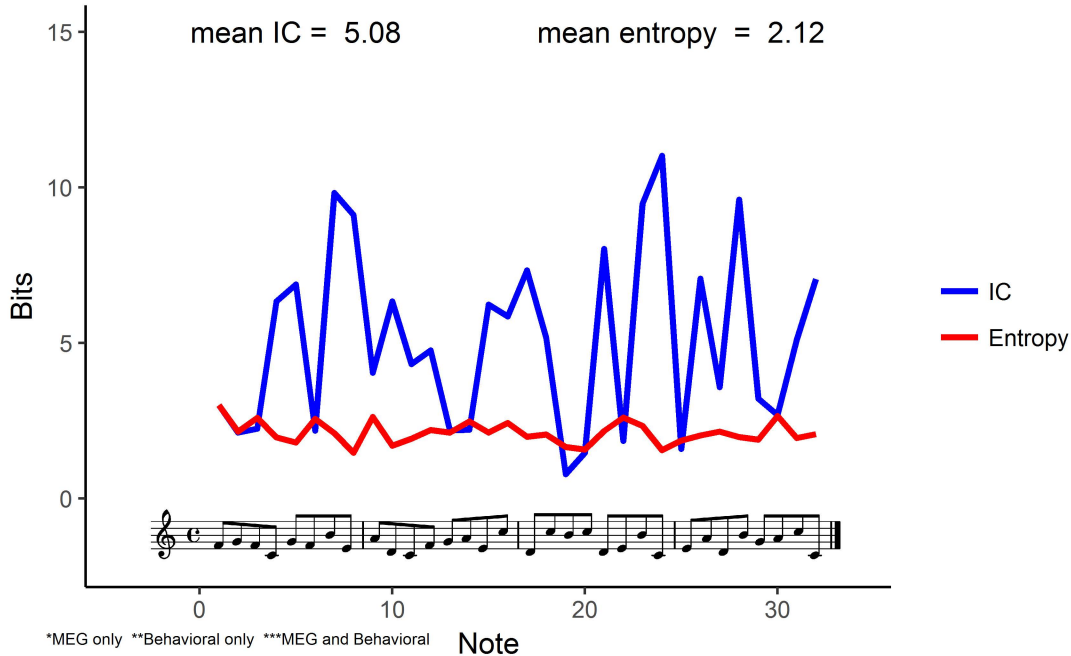

\*MEG only \*\*Behavioral only \*\*\*MEG and Behavioral

Note

# IE3 9\*\*

mean IC = 3.8

mean entropy = 2.13

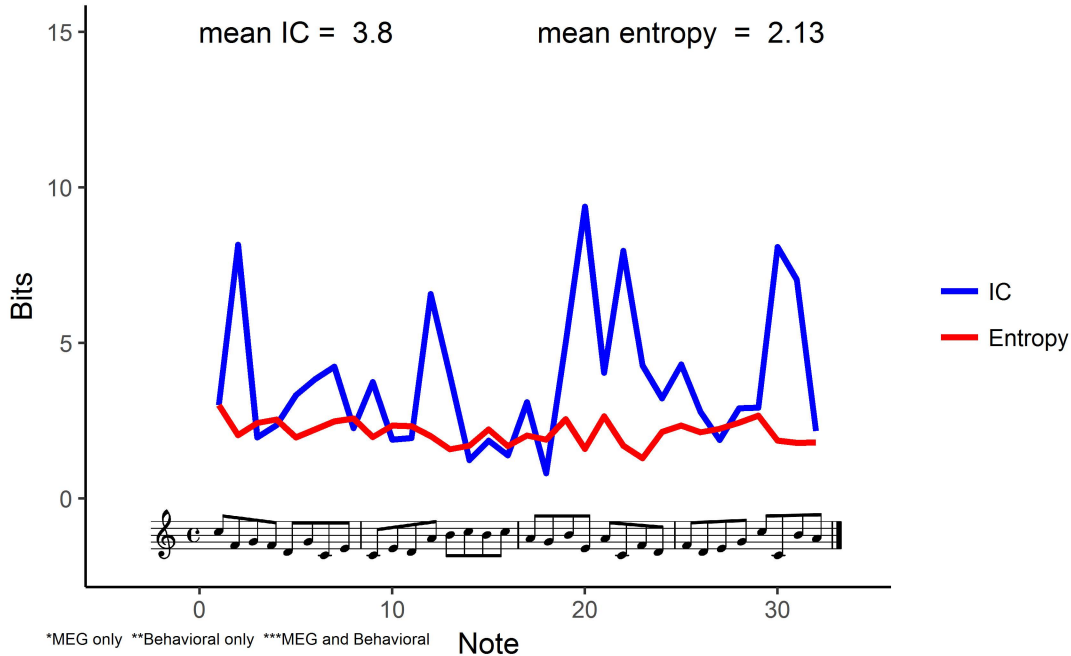

\*MEG only \*\*Behavioral only \*\*\*MEG and Behavioral

Note

IE3 10\*\*

mean IC = 4.81

mean entropy = 2.07

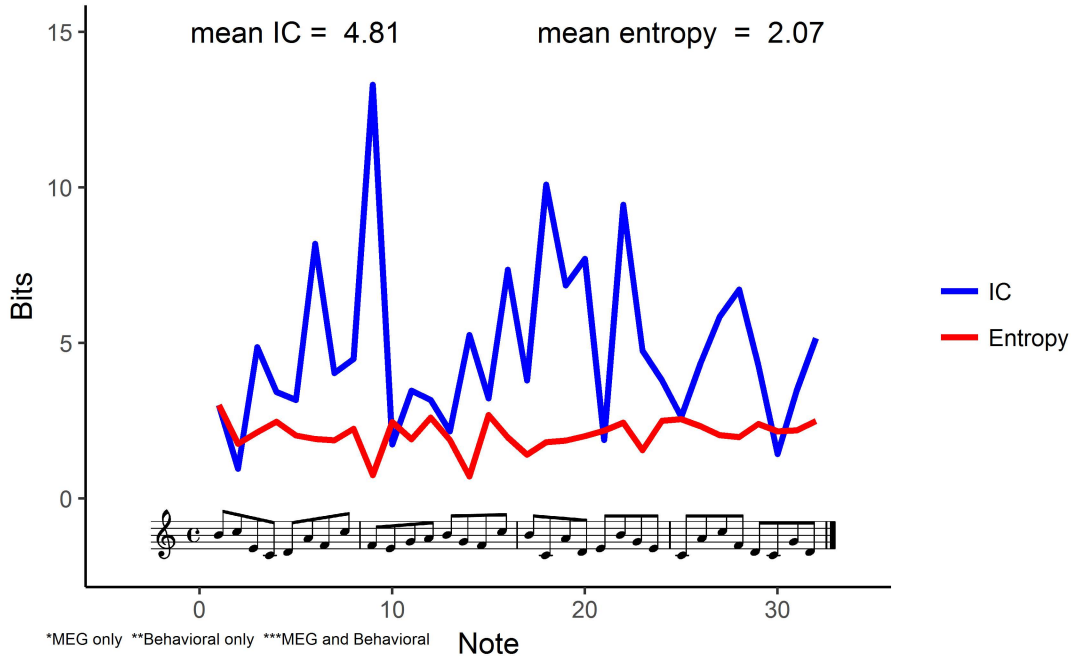

\*MEG only \*\*Behavioral only \*\*\*MEG and Behavioral

# HE major 1\*\*\*

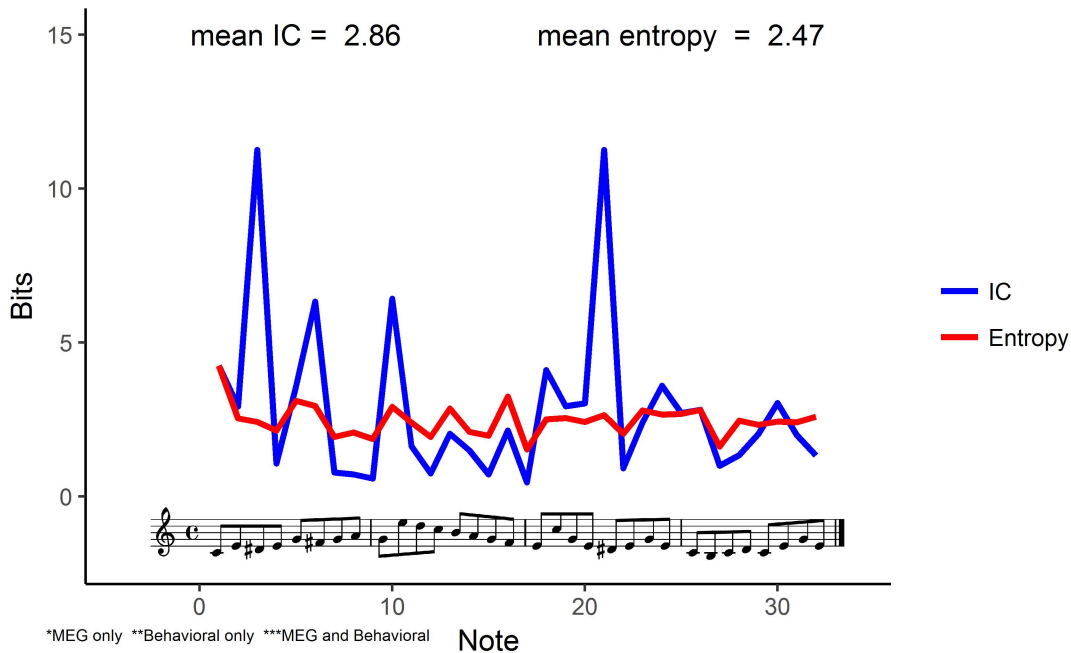

# HE major 2\*\*\*

mean IC = 2.31

mean entropy = 2.42

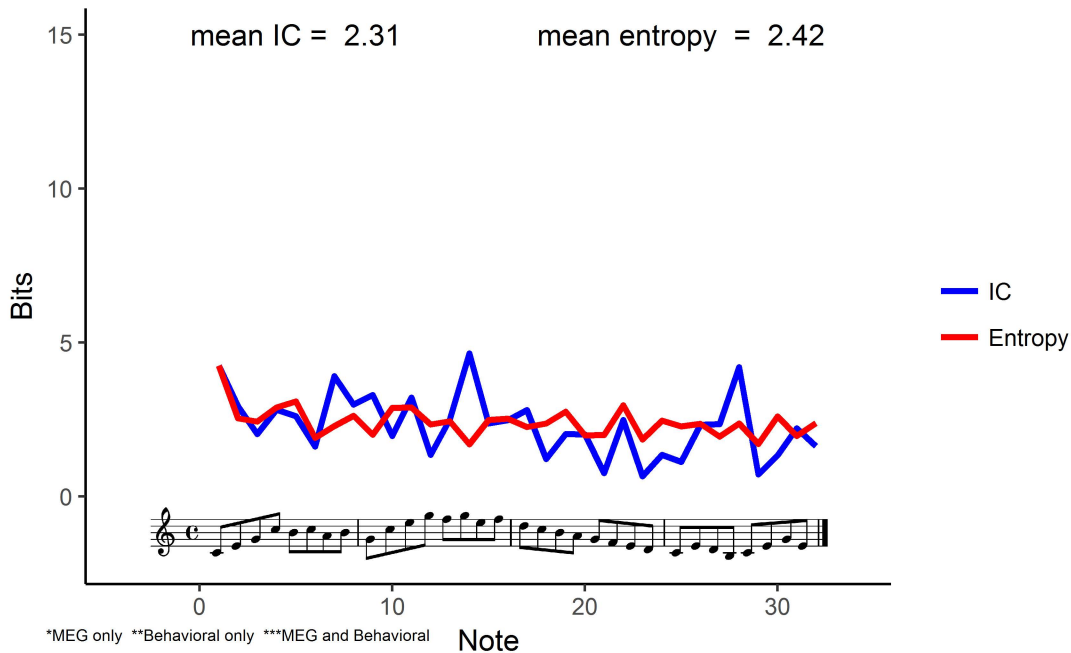

\*MEG only \*\*Behavioral only \*\*\*MEG and Behavioral

Note

# HE major 3\*\*\*

mean IC = 2.54

mean entropy = 2.34

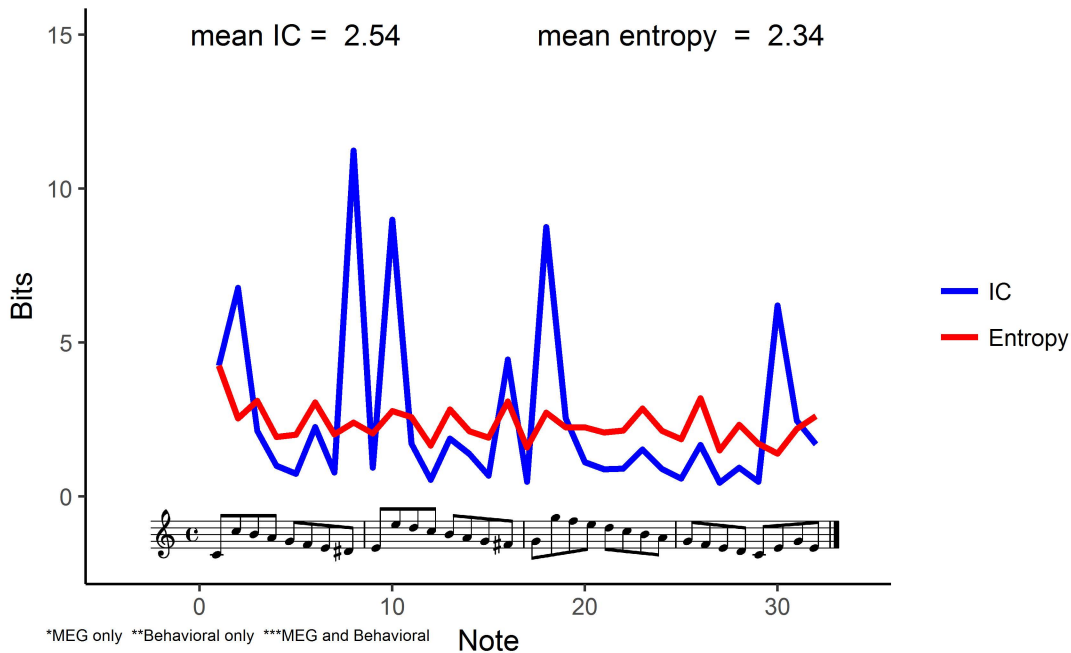

\*MEG only \*\*Behavioral only \*\*\*MEG and Behavioral

# HE major 4\*\*\*

mean IC = 2.26

mean entropy = 2.41

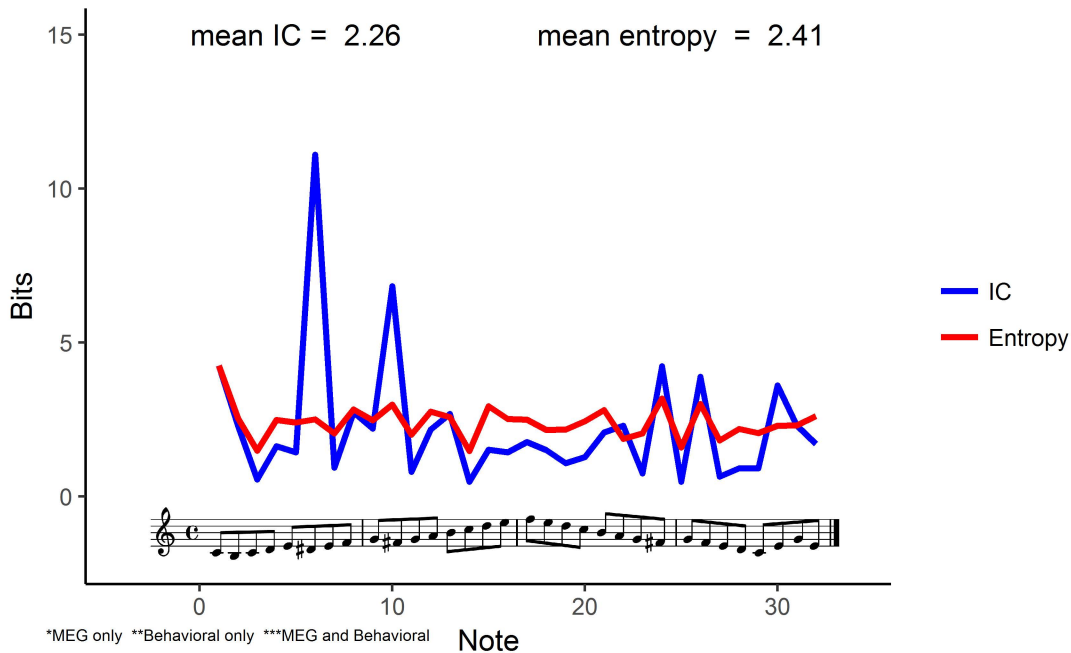

\*MEG only \*\*Behavioral only \*\*\*MEG and Behavioral

# HE major 5\*\*\*

mean IC = 2.42

mean entropy = 2.43

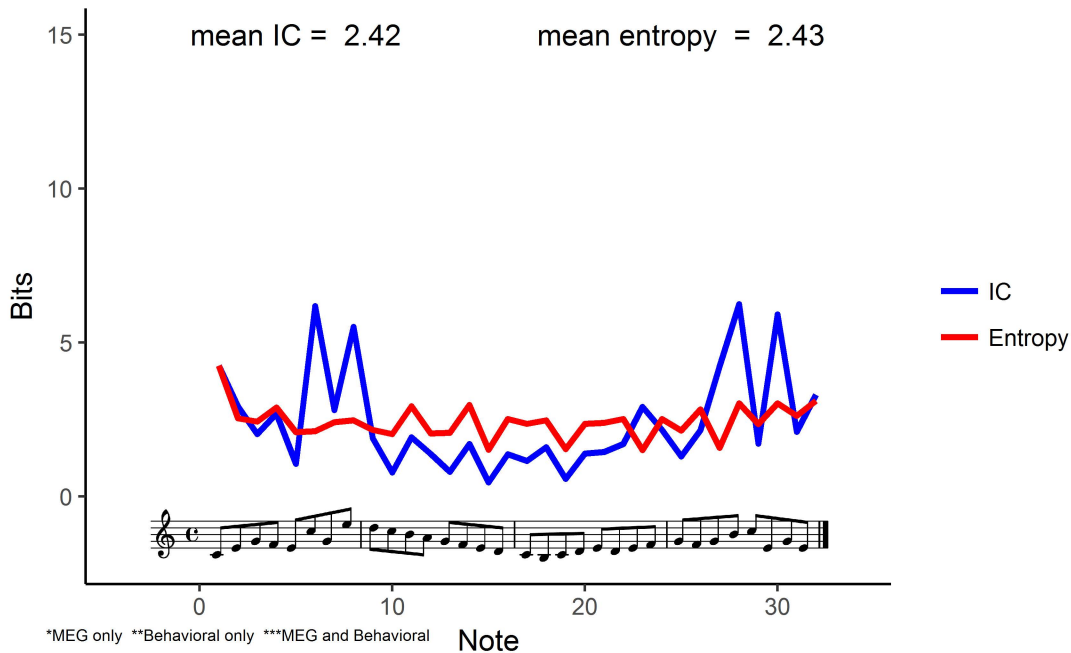



# HE major 6\*

mean IC = 2.56

mean entropy = 2.52

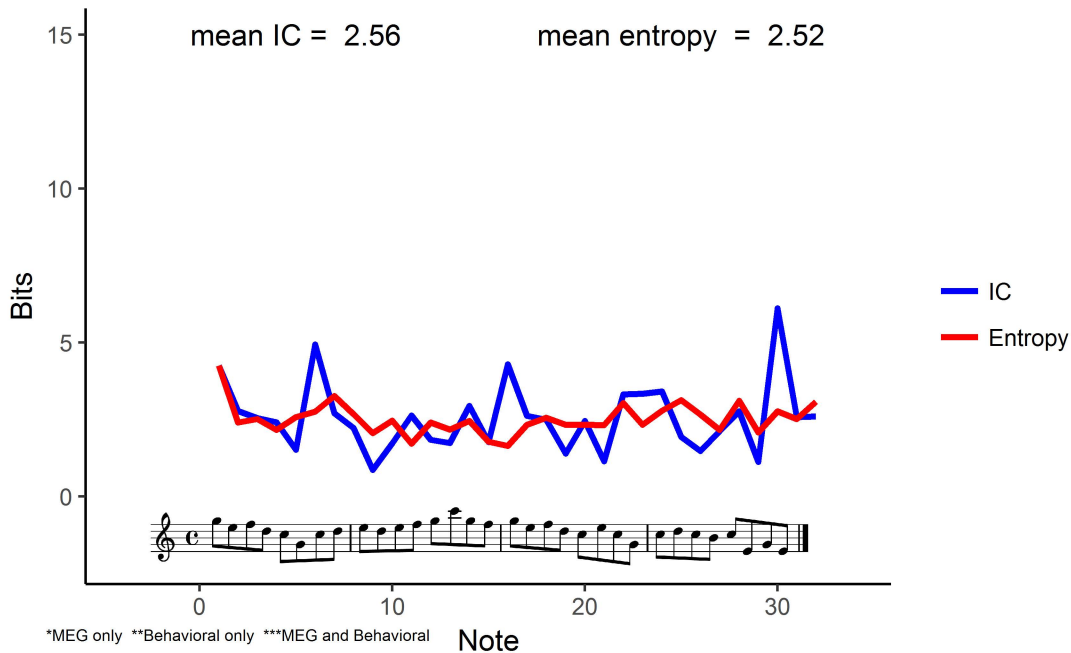

# HE minor 1\*

mean IC = 3.74

mean entropy = 2.12

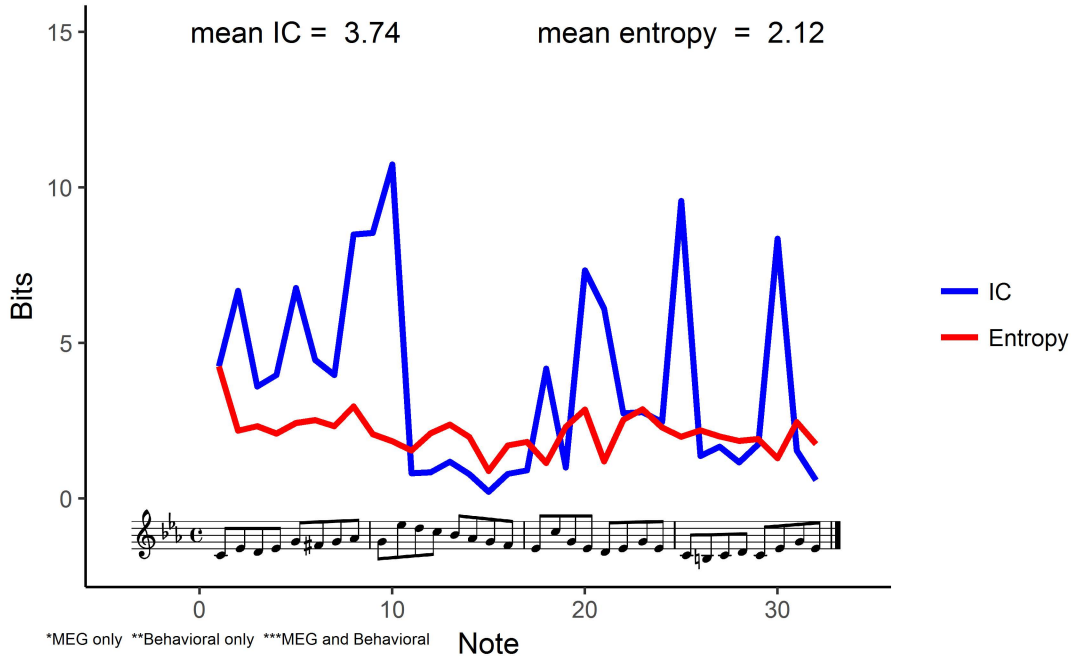

\*MEG only \*\*Behavioral only \*\*\*MEG and Behavioral

# HE minor 2\*

mean IC = 3.75

mean entropy = 2.07

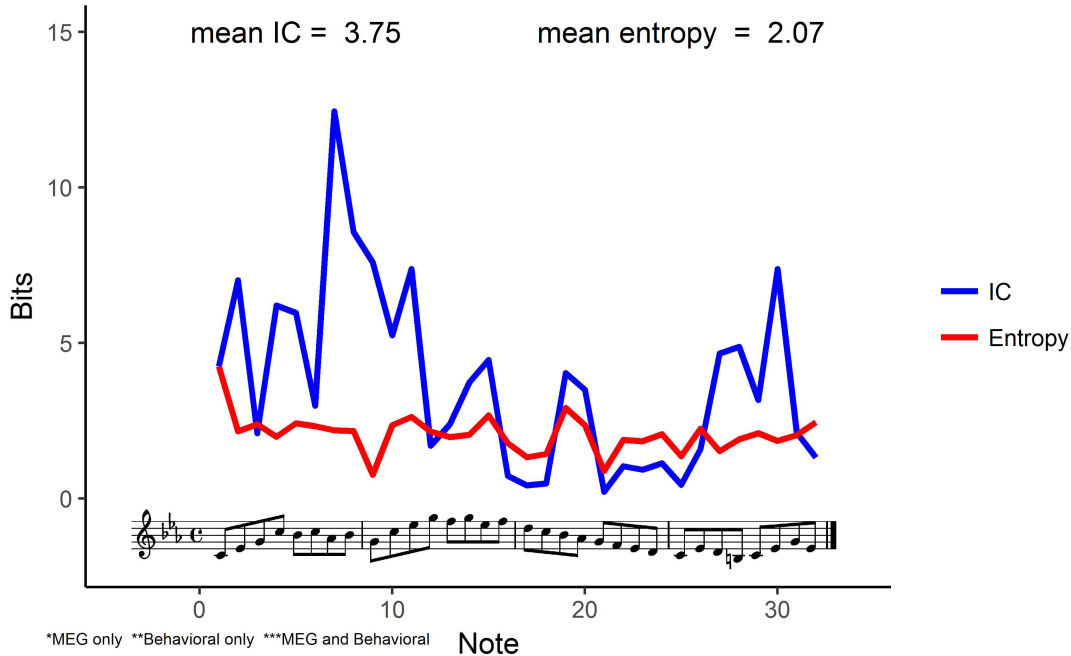

\*MEG only \*\*Behavioral only \*\*\*MEG and Behavioral

# HE minor 3\*

mean IC = 2.65

mean entropy = 2.08

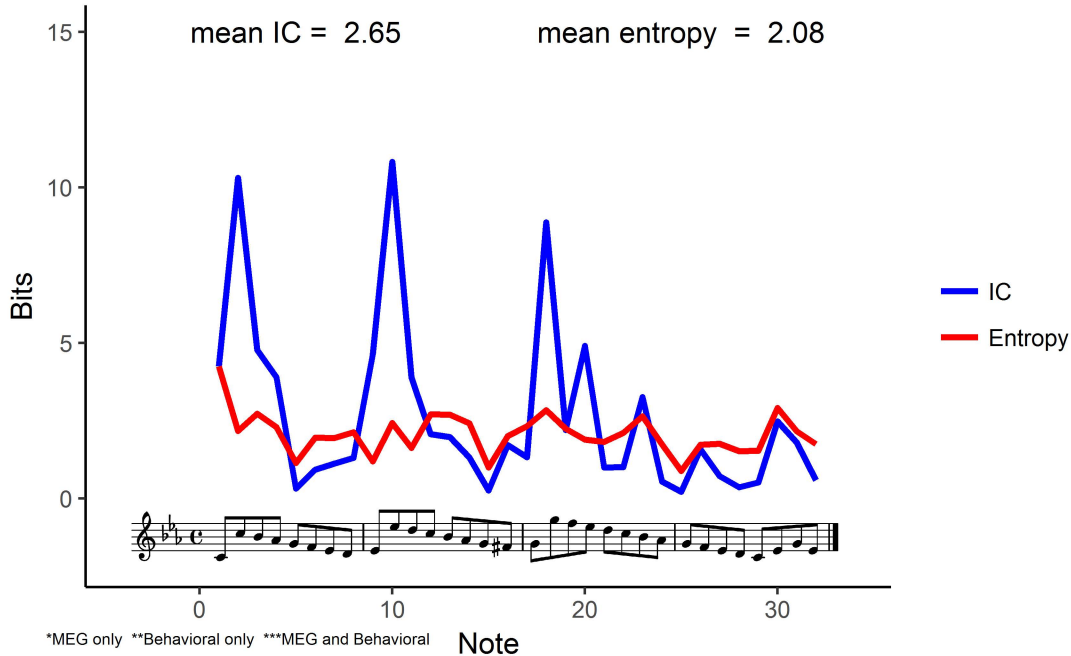

\*MEG only \*\*Behavioral only \*\*\*MEG and Behavioral

# HE minor 4\*

mean IC = 2.34

mean entropy = 2.1

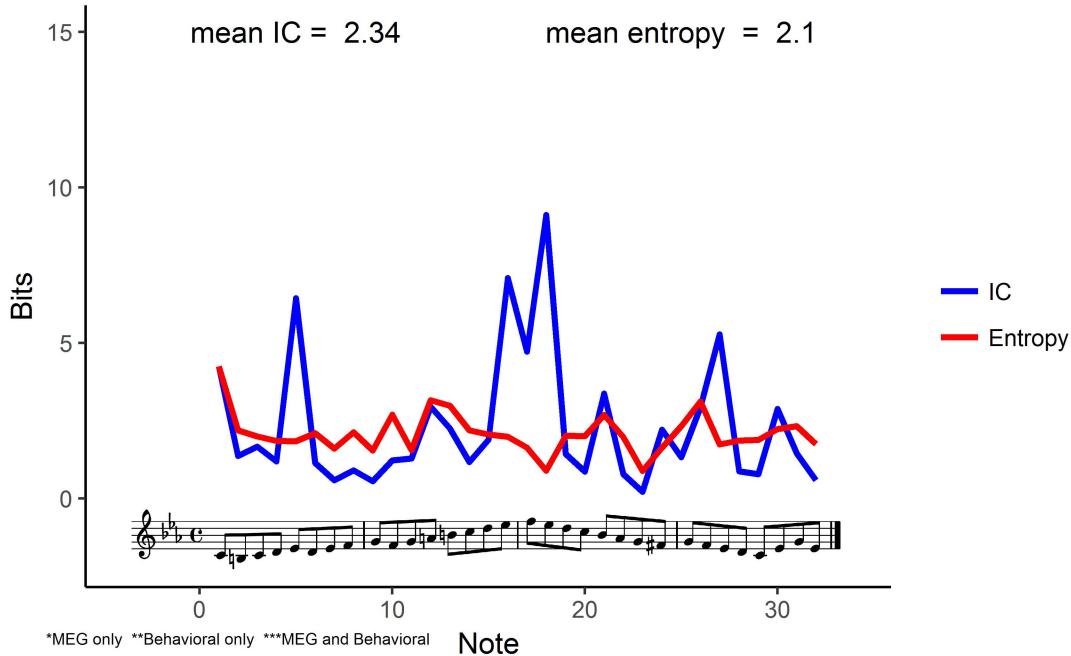

# HE minor 5\*

mean IC = 2.58

mean entropy = 2.09

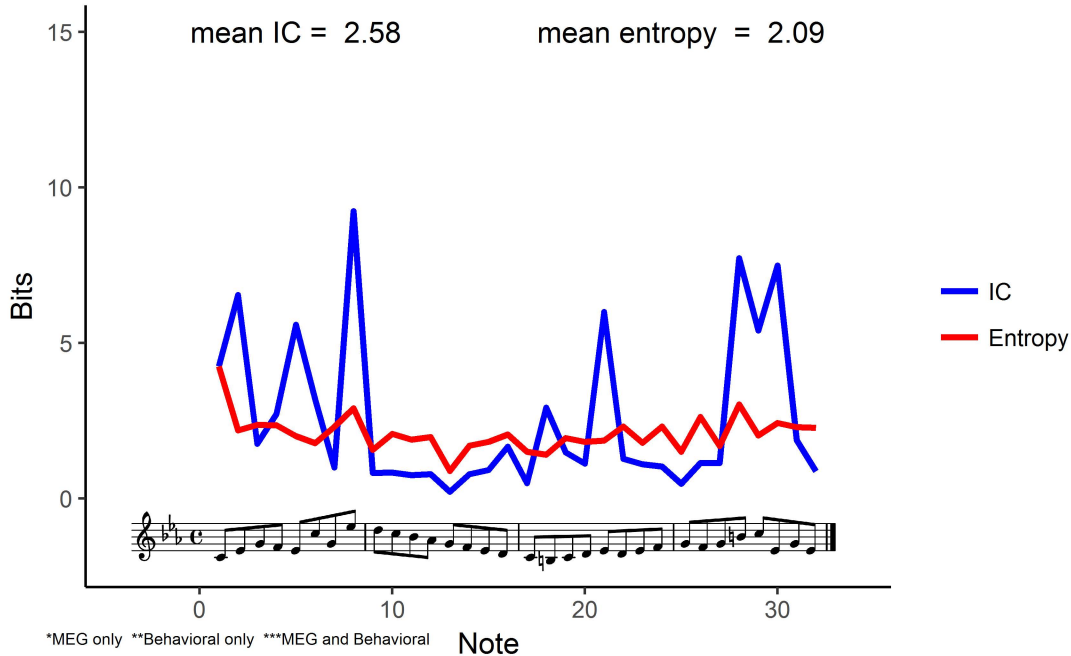

\*MEG only \*\*Behavioral only \*\*\*MEG and Behavioral

Note

# HE minor 6\*

mean IC = 3.46

mean entropy = 2.09

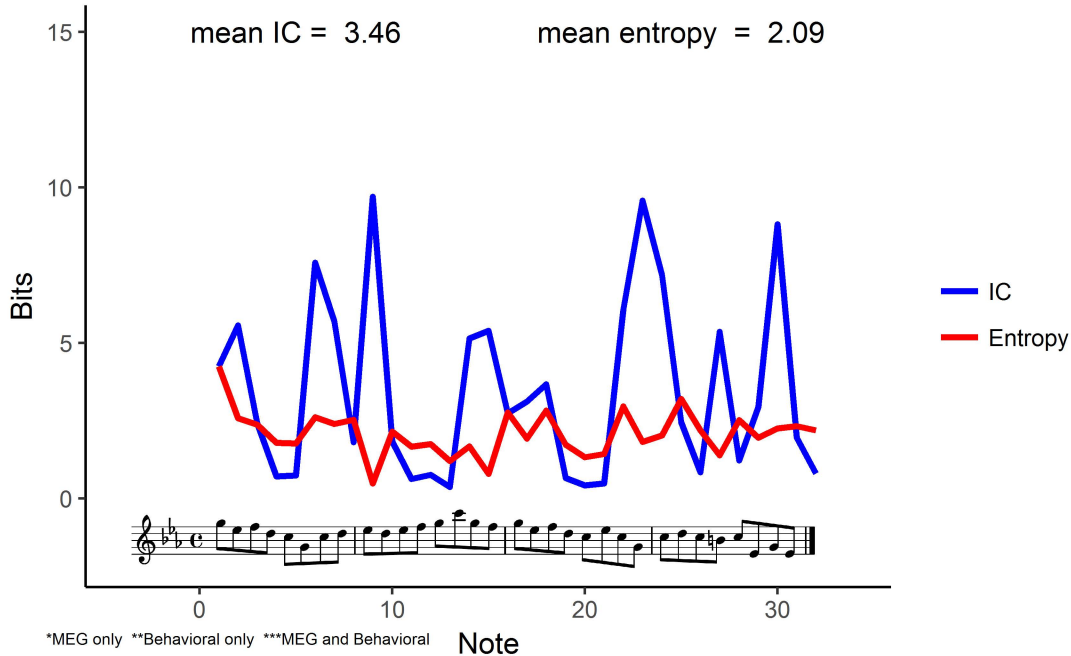

\*MEG only \*\*Behavioral only \*\*\*MEG and Behavioral
