# Supplementary material for: Reduced prediction error responses in high- as compared to low-uncertainty musical contexts
Source: bioRxiv or medRxiv preprint supplement (doi:10.1101/422949), 2019-06-13

## **Supplementary materials 3**

Pitch interval distributions across all subjects for each of the conditions in the MEG and behavioral experiments. Intervals are measured in semitones as the distance between consecutive tones.

# Conditions in the MEG experiment

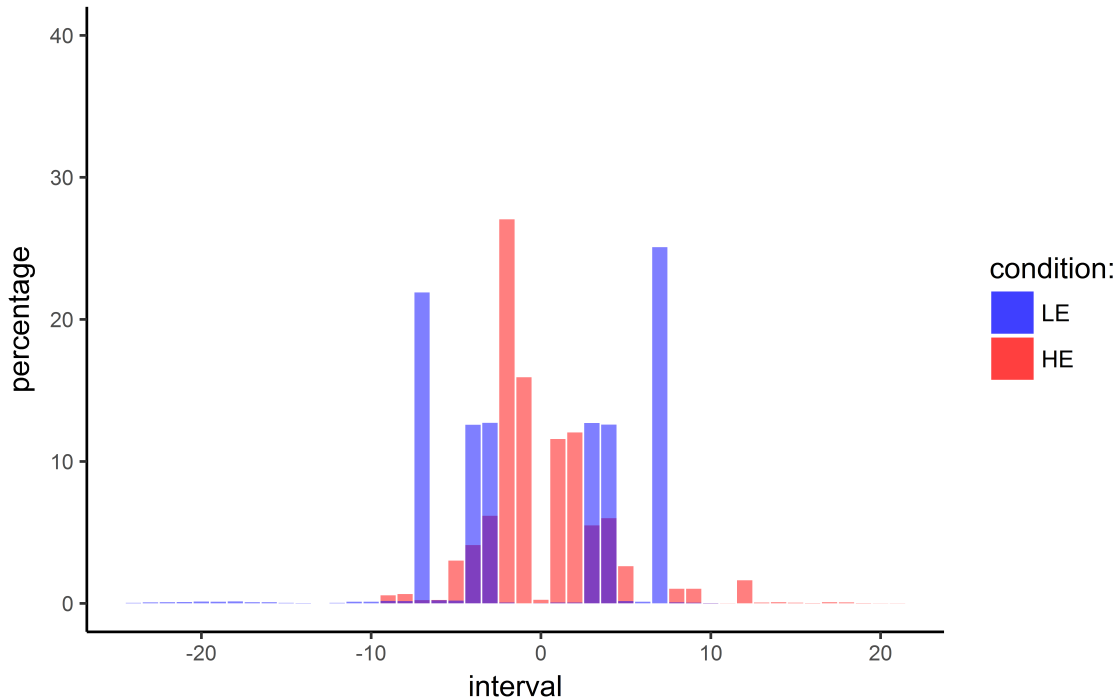

# Low Entropy - Behavioral

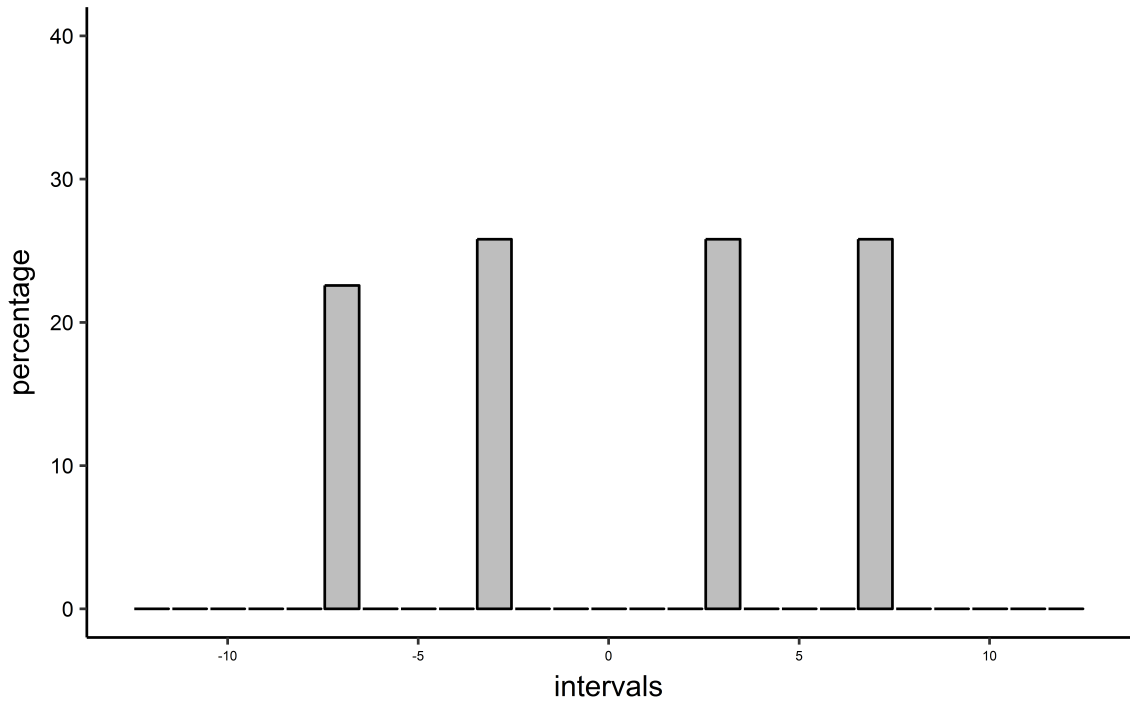

# Intermediate Entropy 1 - Behavioral

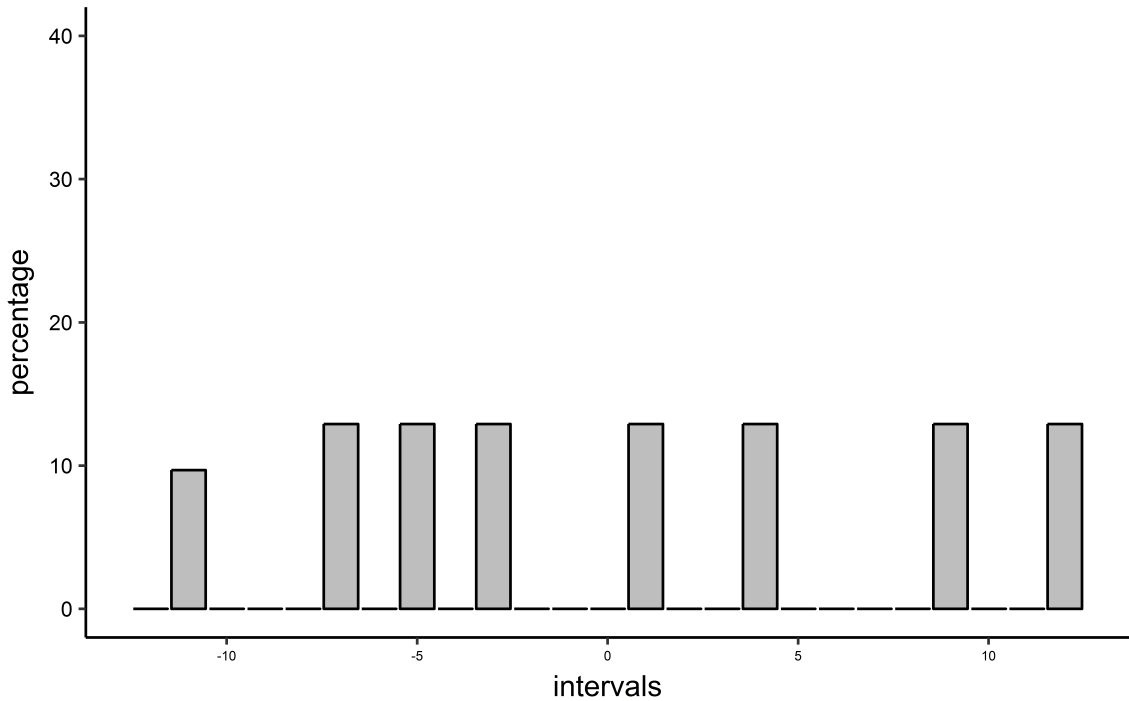

# Intermediate Entropy 2 - Behavioral

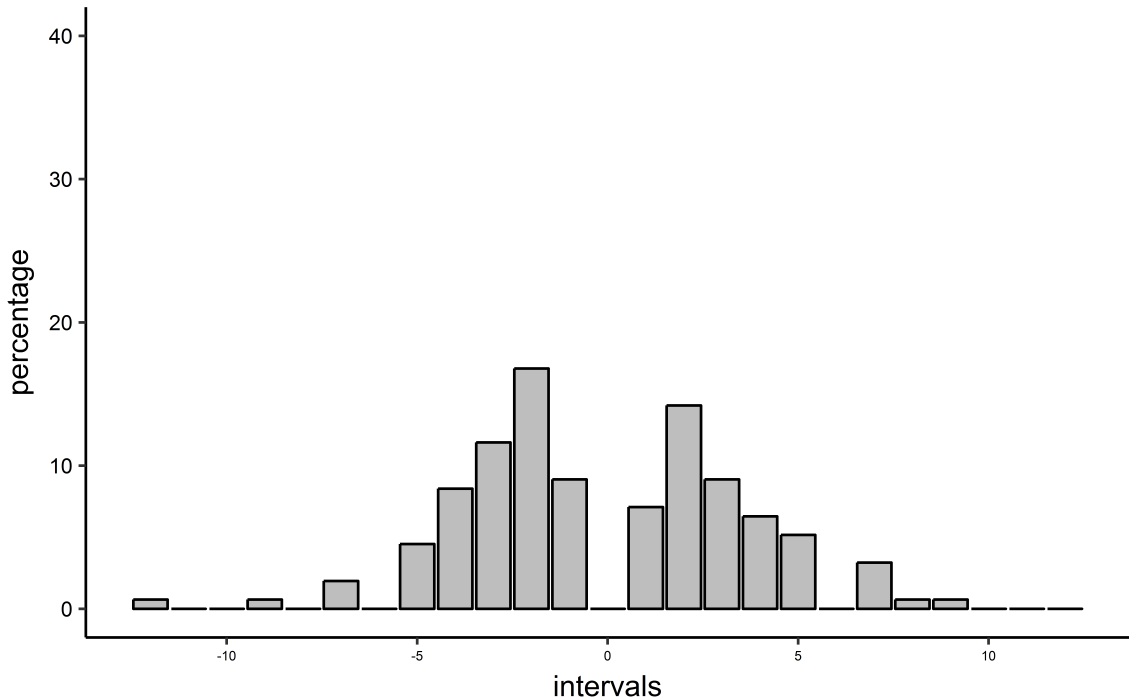

# Intermediate Entropy 3 - Behavioral

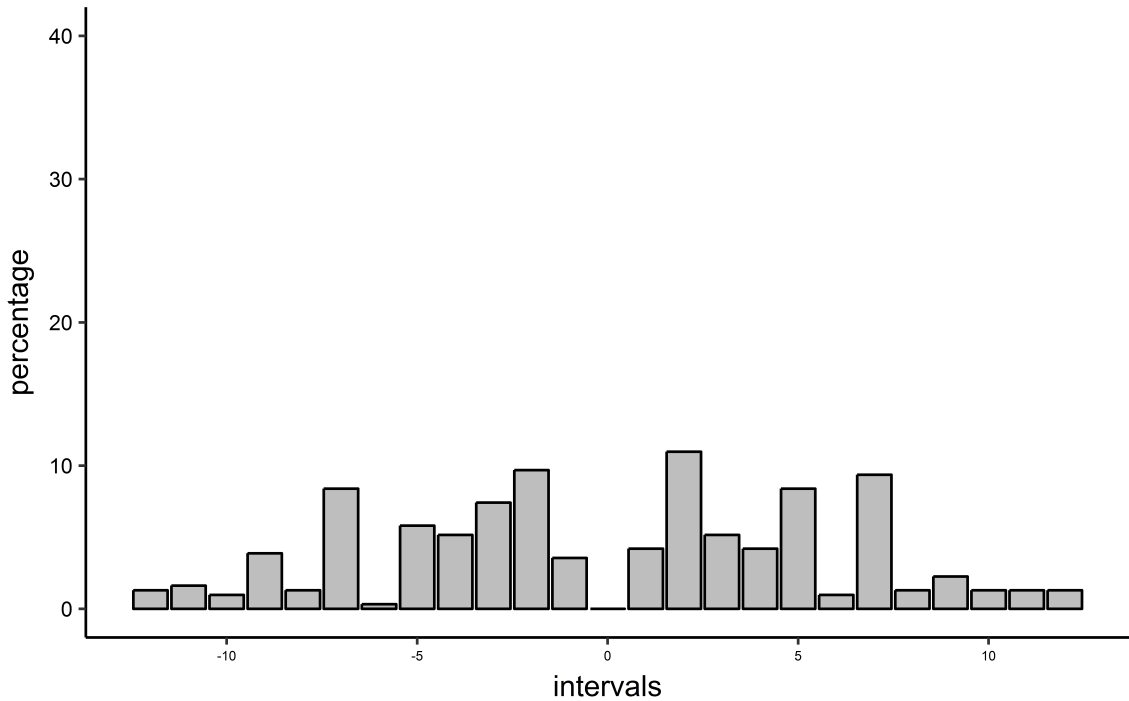

# High Entropy - Behavioral

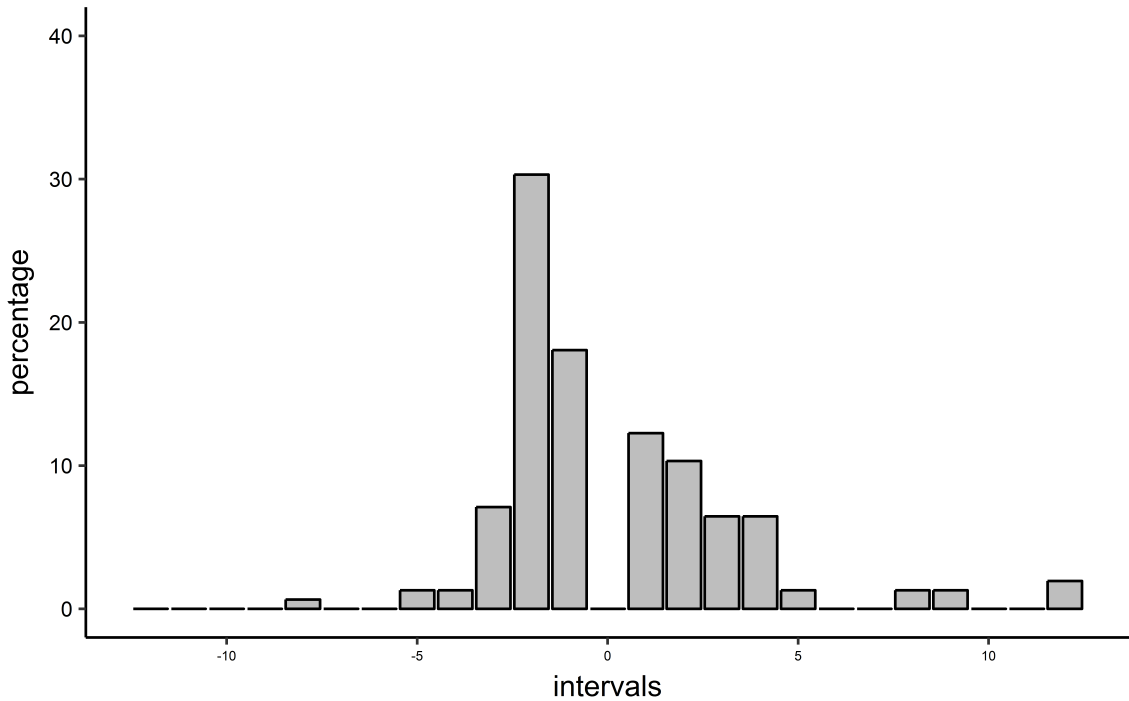

Supplement: Supplementary file [file 422949-3.pdf]
