# Supplementary material for: Reduced prediction error responses in high- as compared to low-uncertainty musical contexts
Source: bioRxiv or medRxiv preprint supplement (doi:10.1101/422949), 2019-06-13
Supplement: Supplementary file [file media-1.pdf]

# Summary of linear mixed models

In this supplementary file, we report all the models and parameters referred to in the article.

## 1. Model of MGA differences by feature:

$$MGA = \beta_0 + \beta_{feature} + \beta_{hemisphere} + \beta_{feature:hemisphere} + \sigma_{subject} + \sigma_{residual}$$

| parameter                | estimate | 2.5 %  | 97.5 % |
|--------------------------|----------|--------|--------|
| Intercept                | 5.80     | 2.79   | 8.81   |
| feature: slide           | -0.40    | -3.96  | 3.17   |
| feature: intensity       | -4.68    | -8.24  | -1.11  |
| feature: timbre          | -7.18    | -10.75 | -3.62  |
| hemisphere: left         | -4.55    | -8.12  | -0.99  |
| feat*hem: slide/left     | 2.71     | -2.34  | 7.75   |
| feat*hem: intensity/left | 6.26     | 1.22   | 11.31  |
| feat*hem: timbre/left    | 7.13     | 2.08   | 12.17  |
| SD (subject)             | 4.03     | 2.76   | 5.88   |
| SD (residual)            | 6.27     | 5.65   | 7.00   |

## 2. Model of differences in slide between conditions

$$MGA_{slide} = \beta_0 + \beta_{latency} + \beta_{hemisphere} + \beta_{latency:hemisphere} + \sigma_{subject} + \sigma$$

| parameter             | estimate | 2.5 % | 97.5 % |
|-----------------------|----------|-------|--------|
| Intercept             | 5.40     | 2.24  | 8.57   |
| latency: 250-350      | -4.58    | -8.58 | -0.58  |
| hemisphere: left      | -1.85    | -5.85 | 2.15   |
| lat*hem: 250-350/left | 1.08     | -4.58 | 6.74   |
| SD (subject)          | 3.60     | 1.11  | 5.83   |
| SD (residual)         | 7.13     | 5.98  | 8.30   |

## 3. Models of d'-scores

$$d_0 = \beta_0 + \sigma_{subject} + \sigma$$

| parameter     | estimate | 2.5 % | 97.5 % |
|---------------|----------|-------|--------|
| Intercept     | 1.08     | 0.73  | 1.43   |
| SD (subject)  | 0.72     | 0.50  | 1.05   |
| SD (residual) | 0.71     | 0.61  | 0.83   |

$$d_1 = \beta_0 + \beta_{entropy} + \sigma_{subject} + \sigma$$

| parameter     | estimate | 2.5 % | 97.5 % |
|---------------|----------|-------|--------|
| Intercept     | 1.71     | 1.30  | 2.12   |
| entropy: IE1  | -0.55    | -0.89 | -0.20  |
| entropy: IE2  | -0.54    | -0.88 | -0.20  |
| entropy: IE3  | -1.04    | -1.38 | -0.69  |
| entropy: HE   | -1.04    | -1.39 | -0.70  |
| SD (subject)  | 0.74     | 0.54  | 1.07   |
| SD (residual) | 0.56     | 0.48  | 0.66   |

$$d_2 = \beta_0 + \beta * entropy + \sigma_{subject} + \sigma$$

| parameter     | estimate | 2.5 % | 97.5 % |
|---------------|----------|-------|--------|
| Intercept     | 1.85     | 1.43  | 2.27   |
| entropy       | -0.26    | -0.34 | -0.18  |
| SD (subject)  | 0.74     | 0.54  | 1.07   |
| SD (residual) | 0.58     | 0.50  | 0.68   |

4. Models of criterion scores:

$$cr_0 = \beta_0 + \sigma_{subject} + \sigma$$

| parameter     | estimate | 2.5 % | 97.5 % |
|---------------|----------|-------|--------|
| Intercept     | 0.27     | 0.03  | 0.51   |
| SD (subject)  | 0.48     | 0.32  | 0.71   |
| SD (residual) | 0.55     | 0.48  | 0.65   |

$$cr_1 = \beta_0 + \beta_{entropy} + \sigma_{subject} + \sigma$$

| parameter     | estimate | 2.5 % | 97.5 % |
|---------------|----------|-------|--------|
| Intercept     | 0.38     | 0.07  | 0.69   |
| entropy: IE1  | 0.14     | -0.18 | 0.45   |
| entropy: IE2  | -0.12    | -0.44 | 0.19   |
| entropy: IE3  | -0.40    | -0.71 | -0.08  |
| entropy: HE   | -0.15    | -0.46 | 0.17   |
| SD (subject)  | 0.48     | 0.33  | 0.71   |
| SD (residual) | 0.51     | 0.45  | 0.60   |

5. Cumulative link models (ordinal regression)

$$c_0 : \log \frac{p(\text{confidence})}{1 - p(\text{confidence})} = \theta_{\text{confidence}} - \sigma_{\text{subject}} - \sigma$$

| parameter    | odds | 2.5 % | 97.5 % |
|--------------|------|-------|--------|
| 1 2          | 0.02 | 0.01  | 0.04   |
| 2 3          | 0.09 | 0.05  | 0.16   |
| 3 4          | 0.30 | 0.17  | 0.52   |
| 4 5          | 0.74 | 0.42  | 1.31   |
| 5 6          | 2.23 | 1.27  | 3.90   |
| 6 7          | 8.76 | 4.95  | 15.49  |
| SD (subject) | 3.67 | NA    | NA     |

$$c_1 : \log \frac{p(\text{confidence})}{1 - p(\text{confidence})_0} = \theta_{\text{confidence}} - \beta * \text{entropy} - \sigma_{\text{subject}} - \sigma$$

| parameter    | odds | 2.5 % | 97.5 % |
|--------------|------|-------|--------|
| 1 2          | 0.01 | 0.00  | 0.01   |
| 2 3          | 0.02 | 0.01  | 0.05   |
| 3 4          | 0.08 | 0.04  | 0.16   |
| 4 5          | 0.22 | 0.12  | 0.41   |
| 5 6          | 0.73 | 0.39  | 1.35   |
| 6 7          | 3.19 | 1.72  | 5.99   |
| IE1          | 0.35 | 0.27  | 0.44   |
| IE2          | 0.23 | 0.18  | 0.30   |
| IE3          | 0.16 | 0.12  | 0.20   |
| HE           | 0.25 | 0.19  | 0.32   |
| SD (subject) | 3.97 | NA    | NA     |

$$c_2 : \log \frac{p(\text{confidence})}{1 - p(\text{confidence})} = \theta_{\text{confidence}} - \beta * \text{entropy} - \sigma_{\text{subject}} - \sigma$$

| parameter    | odds | 2.5 % | 97.5 % |
|--------------|------|-------|--------|
| 1 2          | 0.01 | 0.00  | 0.01   |
| 2 3          | 0.03 | 0.02  | 0.05   |
| 3 4          | 0.10 | 0.05  | 0.18   |
| 4 5          | 0.26 | 0.14  | 0.47   |
| 5 6          | 0.80 | 0.44  | 1.48   |
| 6 7          | 3.42 | 1.86  | 6.23   |
| entropy      | 0.71 | 0.67  | 0.75   |
| SD (subject) | 3.82 | NA    | NA     |

$$c_{1s} : \log \frac{p(\text{confidence})}{1 - p(\text{confidence})} = \theta_{\text{confidence}} - \beta_{\text{entropy}} - \sigma_{\text{subject}} - \sigma_{\text{entropy*subject}} - \sigma$$

| parameter    | odds | 2.5 % | 97.5 % |
|--------------|------|-------|--------|
| 1 2          | 0.00 | 0.00  | 0.01   |
| 2 3          | 0.02 | 0.01  | 0.04   |
| 3 4          | 0.06 | 0.03  | 0.14   |
| 4 5          | 0.18 | 0.09  | 0.39   |
| 5 6          | 0.66 | 0.31  | 1.40   |
| 6 7          | 3.35 | 1.58  | 7.17   |
| IE1          | 0.33 | 0.23  | 0.47   |
| IE2          | 0.19 | 0.10  | 0.36   |
| IE3          | 0.12 | 0.05  | 0.27   |
| HE           | 0.20 | 0.12  | 0.35   |
| SD (subject) | 5.47 | NA    | NA     |
| SD (IE1)     | 1.86 | NA    | NA     |
| SD (IE2)     | 3.97 | NA    | NA     |
| SD (IE3)     | 5.93 | NA    | NA     |
| SD (HE)      | 3.16 | NA    | NA     |

$$c_{2s} : \log \frac{p(\text{confidence})}{1 - p(\text{confidence})} = \theta_{\text{confidence}} - \beta * \text{entropy} - \sigma_{\text{subject}} - \sigma_{\text{entropy*subject}} - \sigma$$

| parameter    | odds | 2.5 % | 97.5 % |
|--------------|------|-------|--------|
| 1 2          | 0.00 | 0.00  | 0.01   |
| 2 3          | 0.02 | 0.01  | 0.05   |
| 3 4          | 0.08 | 0.04  | 0.18   |
| 4 5          | 0.22 | 0.10  | 0.49   |
| 5 6          | 0.73 | 0.33  | 1.60   |
| 6 7          | 3.25 | 1.48  | 7.24   |
| entropy      | 0.68 | 0.57  | 0.81   |
| SD (subject) | 6.05 | NA    | NA     |
| SD (entropy) | 1.48 | NA    | NA     |
