# Supplementary material for: Reduced prediction error responses in high- as compared to low-uncertainty musical contexts
Source: bioRxiv or medRxiv preprint supplement (doi:10.1101/422949), 2019-06-13
Supplement: Supplementary file [file media-2.pdf]

Individual stimulus sequences used in the experiments  
with their respective IDyOM estimates



LE-2\*

mean IC = 1.57

mean entropy = 1.12

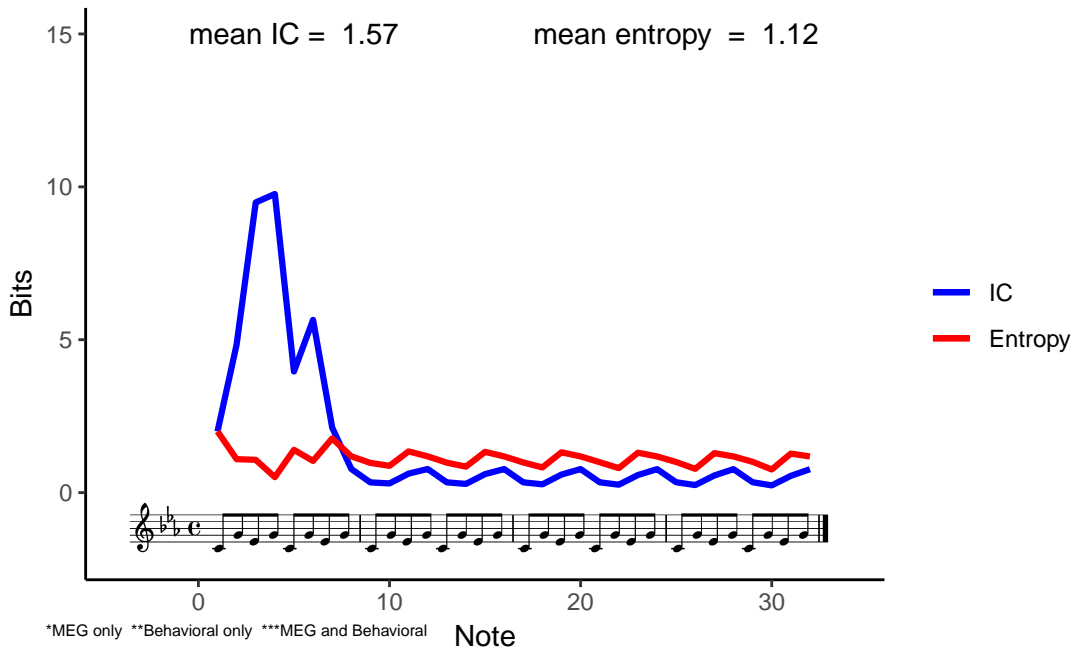

\*MEG only \*\*Behavioral only \*\*\*MEG and Behavioral

Note

IE1-1\*\*

mean IC = 2.54

mean entropy = 2.01

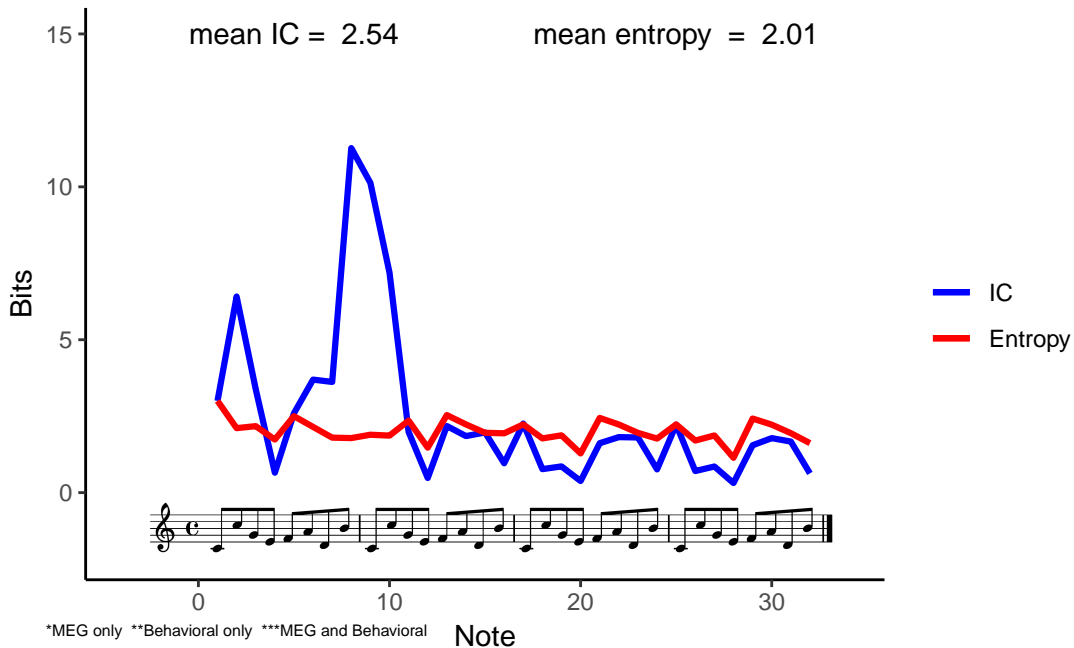

\*MEG only \*\*Behavioral only \*\*\*MEG and Behavioral

Note

IE2-1\*\*

mean IC = 2.68

mean entropy = 2.11

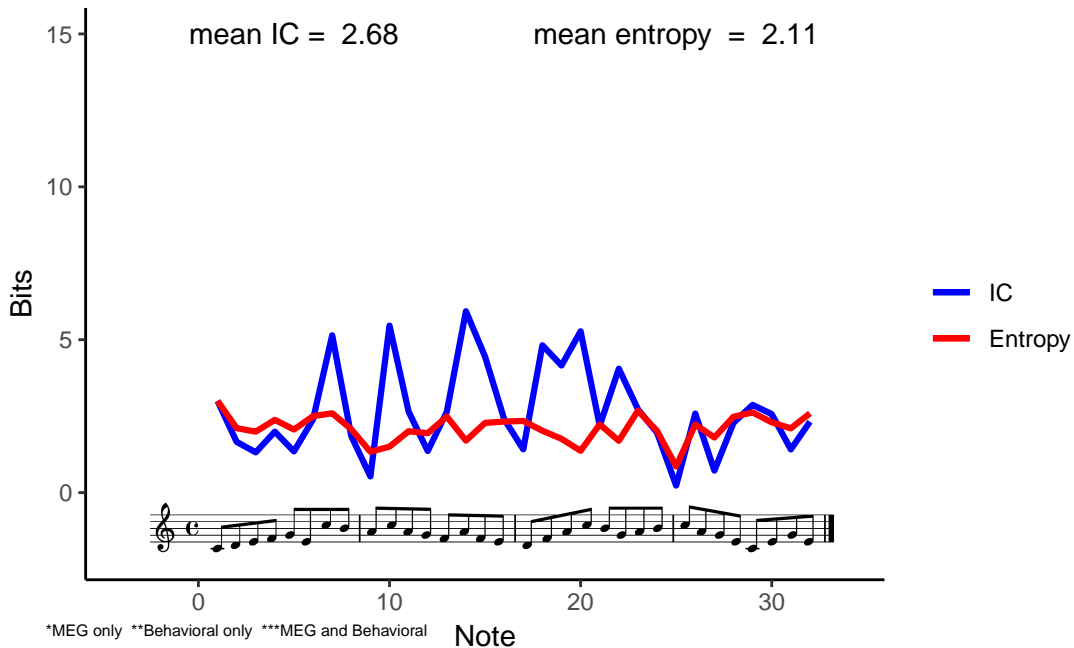

\*MEG only \*\*Behavioral only \*\*\*MEG and Behavioral

Note

IE2-2\*\*

mean IC = 2.9

mean entropy = 2.11

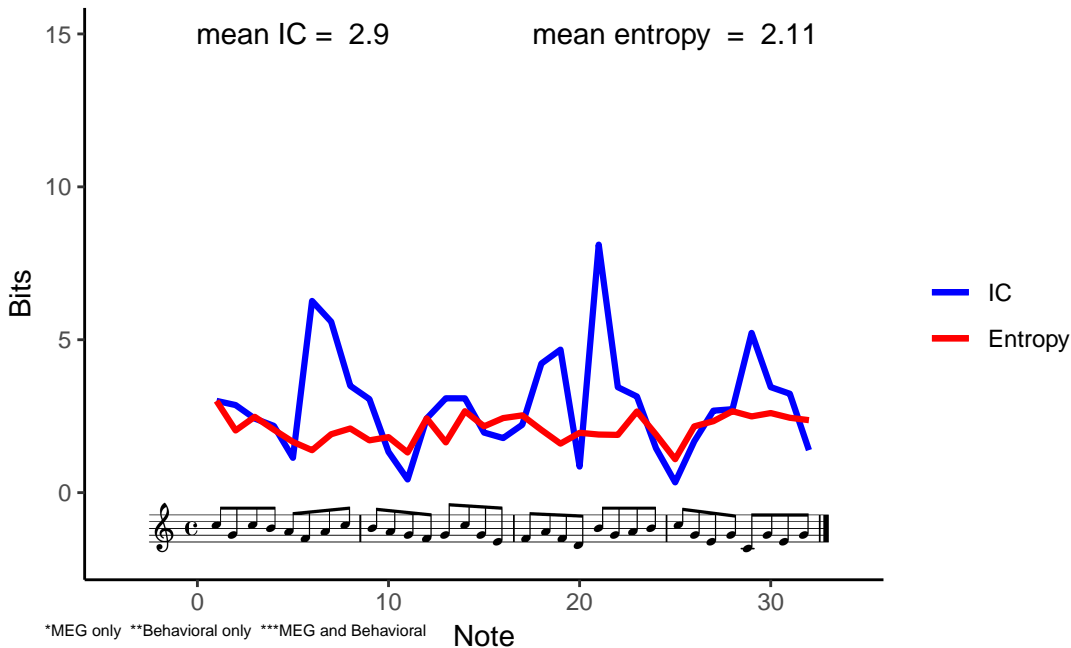

\*MEG only \*\*Behavioral only \*\*\*MEG and Behavioral

Note

IE2-3\*\*

mean IC = 2.68

mean entropy = 2.09

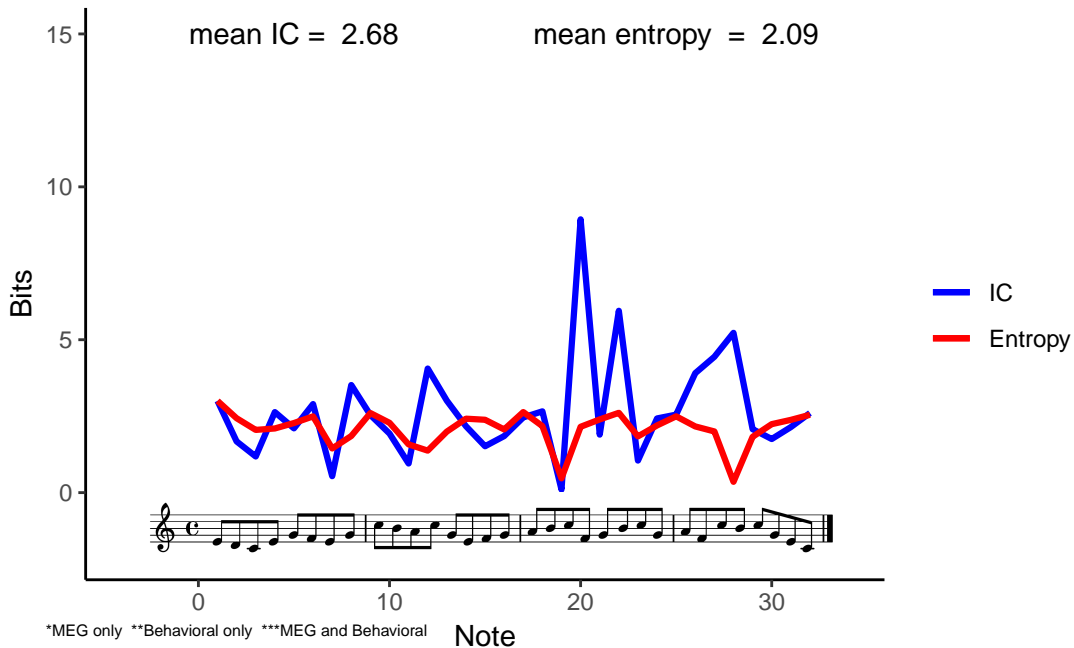

\*MEG only \*\*Behavioral only \*\*\*MEG and Behavioral

Note

IE2-4\*\*

mean IC = 3.06

mean entropy = 2.16

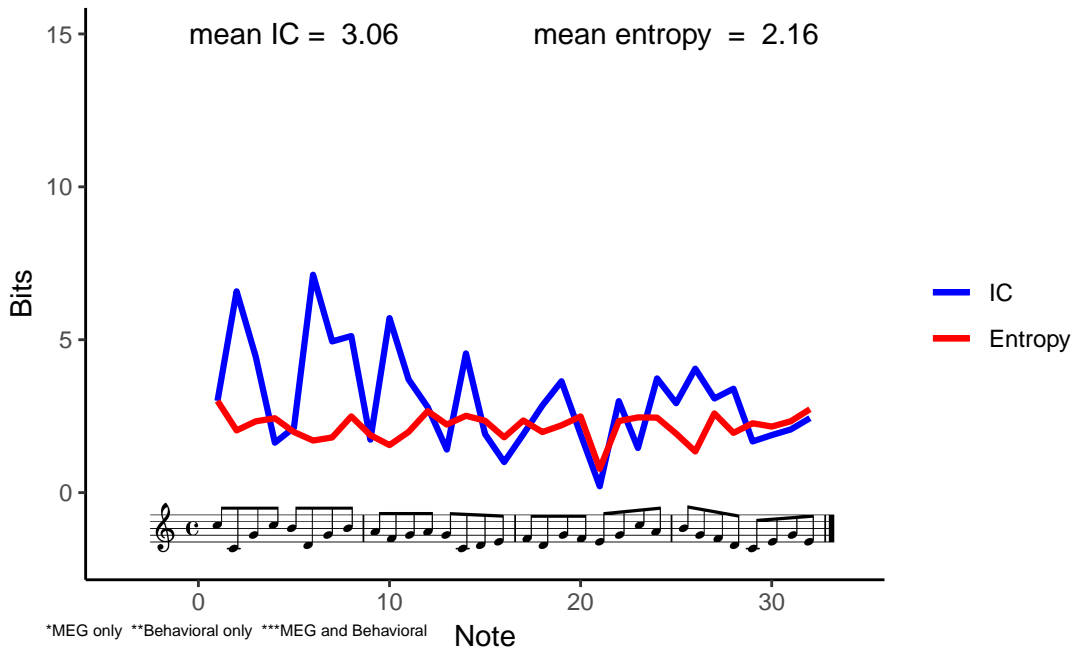

\*MEG only \*\*Behavioral only \*\*\*MEG and Behavioral



IE2-5\*\*

mean IC = 2.6

mean entropy = 2.03

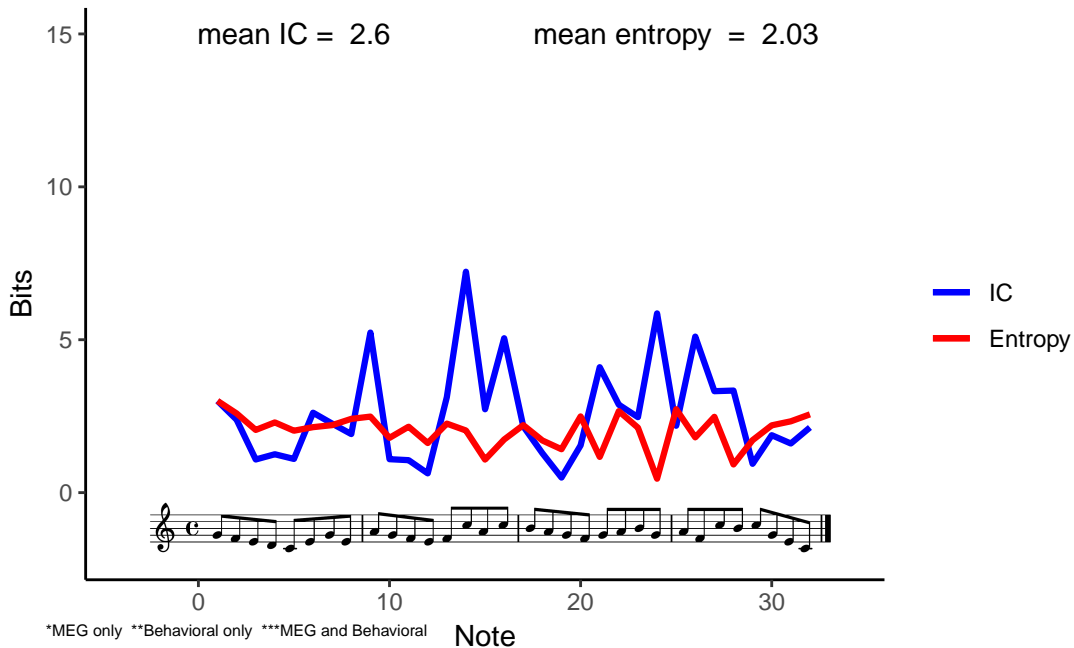

\*MEG only \*\*Behavioral only \*\*\*MEG and Behavioral

Note

IE3-1\*\*

mean IC = 4.33

mean entropy = 2.13

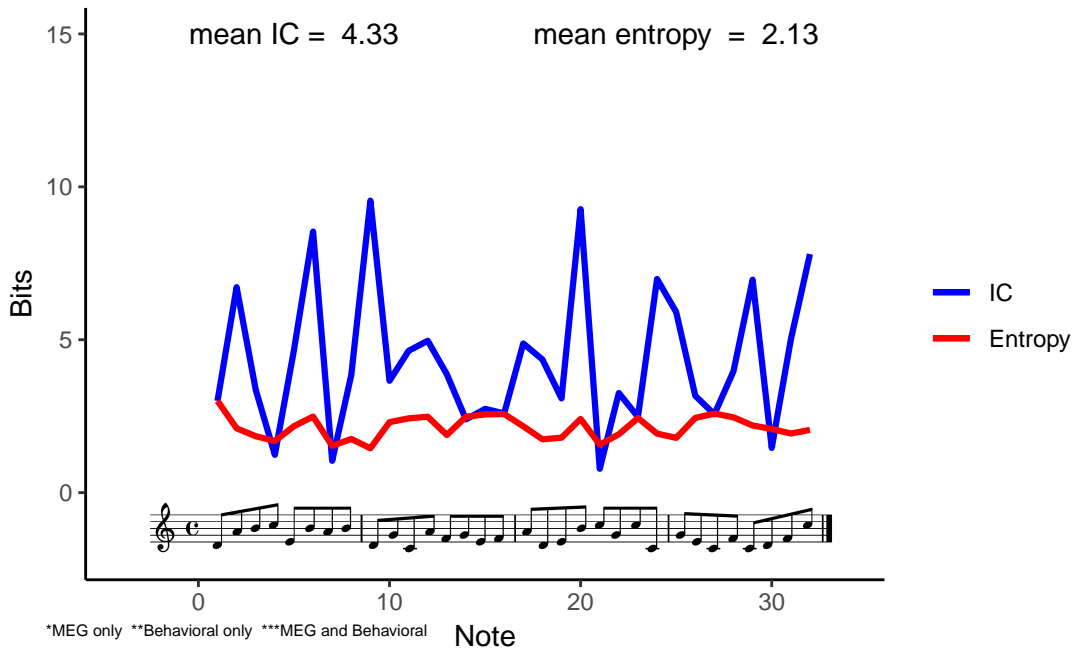

\*MEG only \*\*Behavioral only \*\*\*MEG and Behavioral

Note

IE3-2\*\*

mean IC = 4.62

mean entropy = 2.15

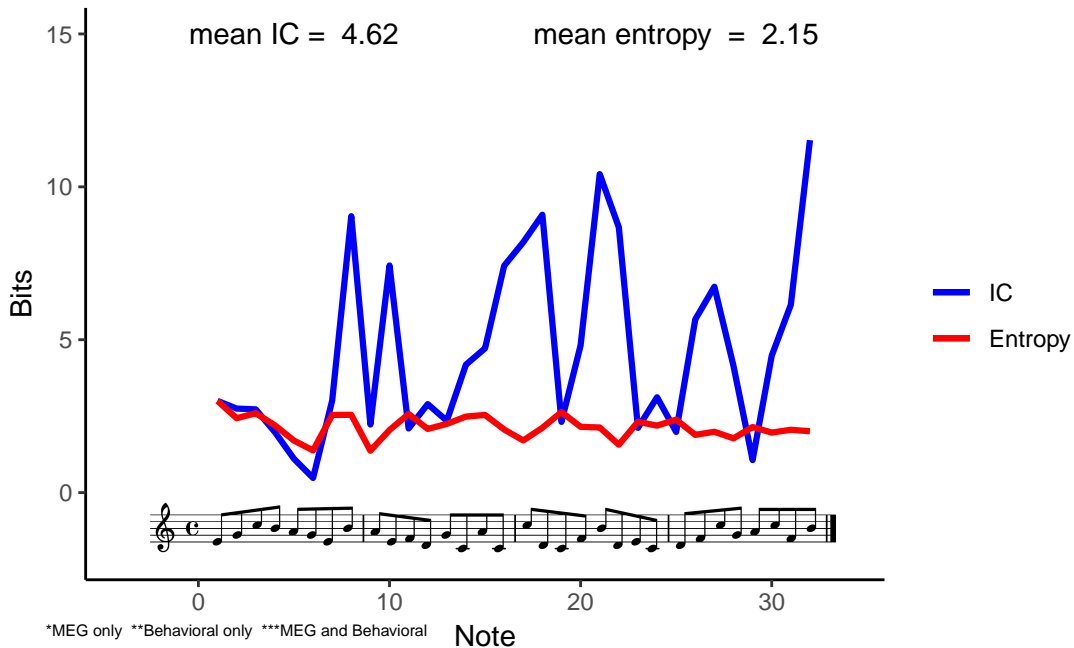

\*MEG only \*\*Behavioral only \*\*\*MEG and Behavioral

Note

IE3-3\*\*

mean IC = 4.9

mean entropy = 2.13

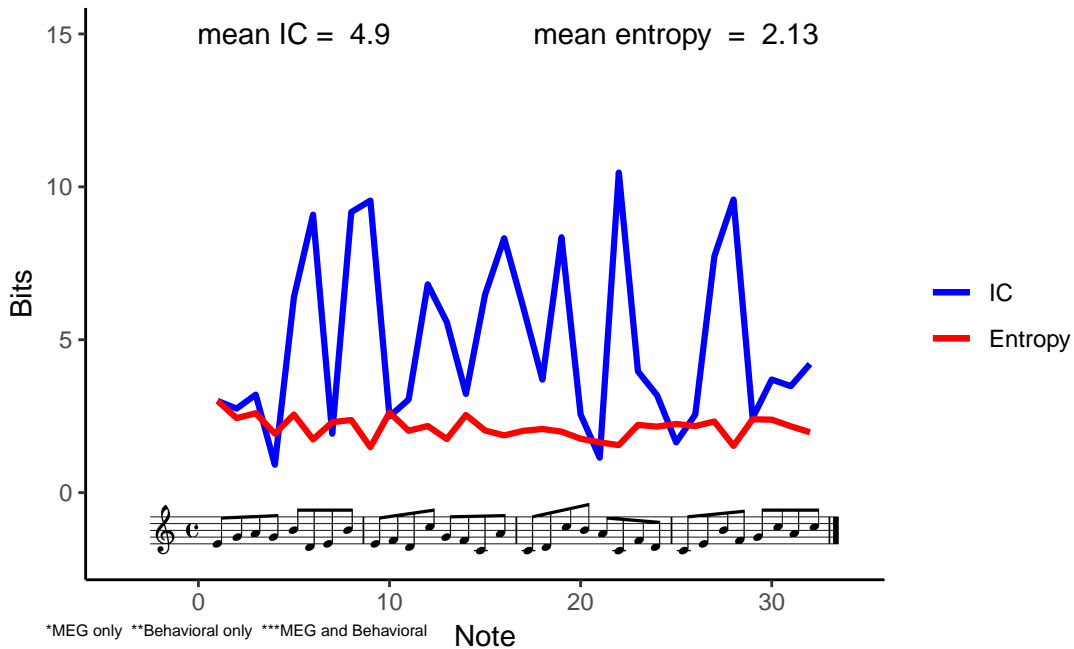

\*MEG only \*\*Behavioral only \*\*\*MEG and Behavioral

Note

# IE3-4\*\*

mean IC = 4.22

mean entropy = 2.15

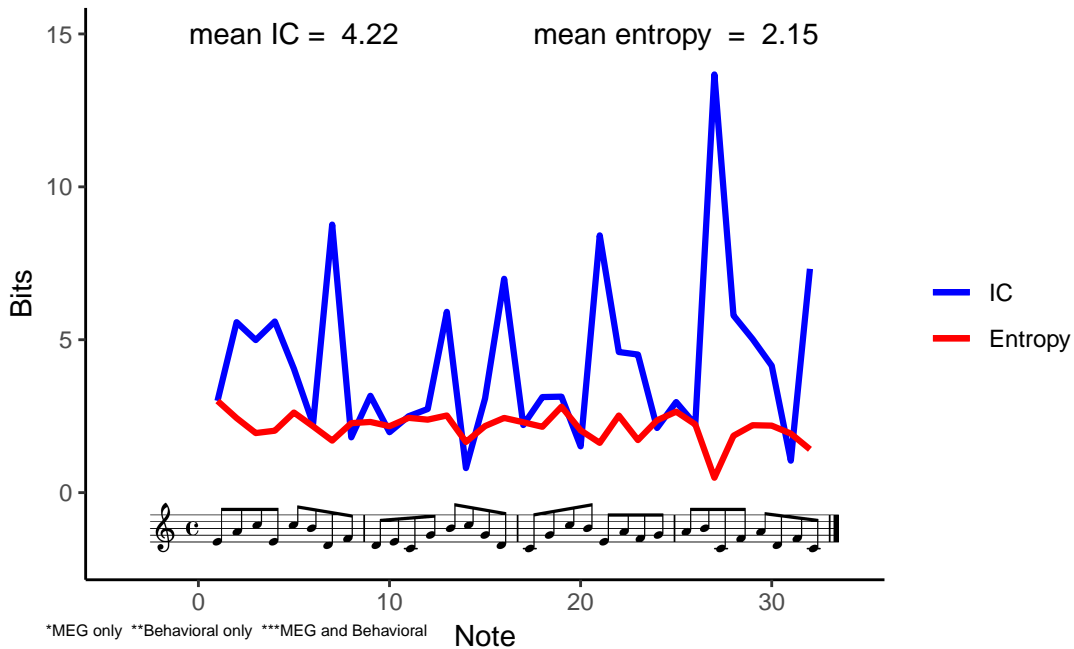

\*MEG only \*\*Behavioral only \*\*\*MEG and Behavioral

Note

IE3-5\*\*

mean IC = 4.85

mean entropy = 2.1

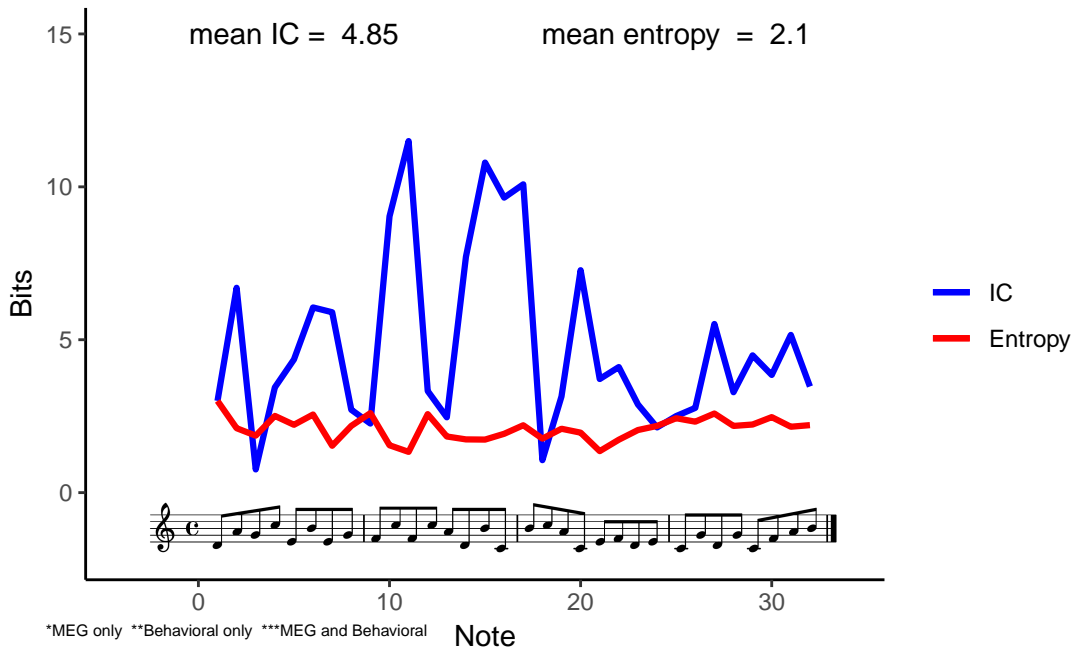

\*MEG only \*\*Behavioral only \*\*\*MEG and Behavioral

Note

# IE3-6\*\*

mean IC = 5.18

mean entropy = 2.12

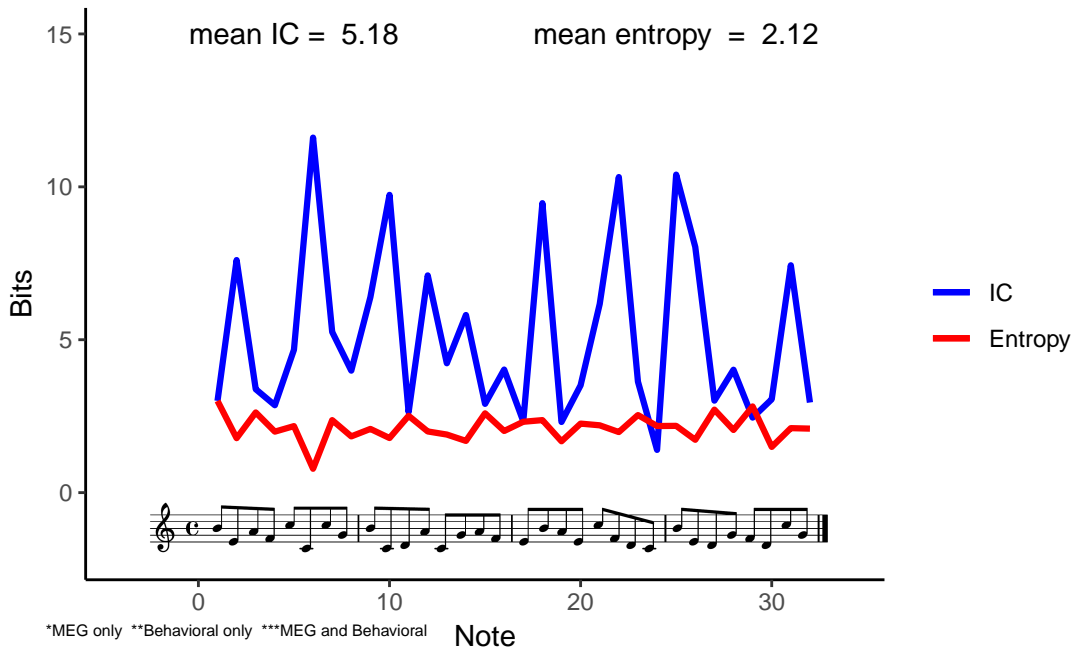

\*MEG only \*\*Behavioral only \*\*\*MEG and Behavioral

Note

# IE3-7\*\*

mean IC = 4.41

mean entropy = 2.21

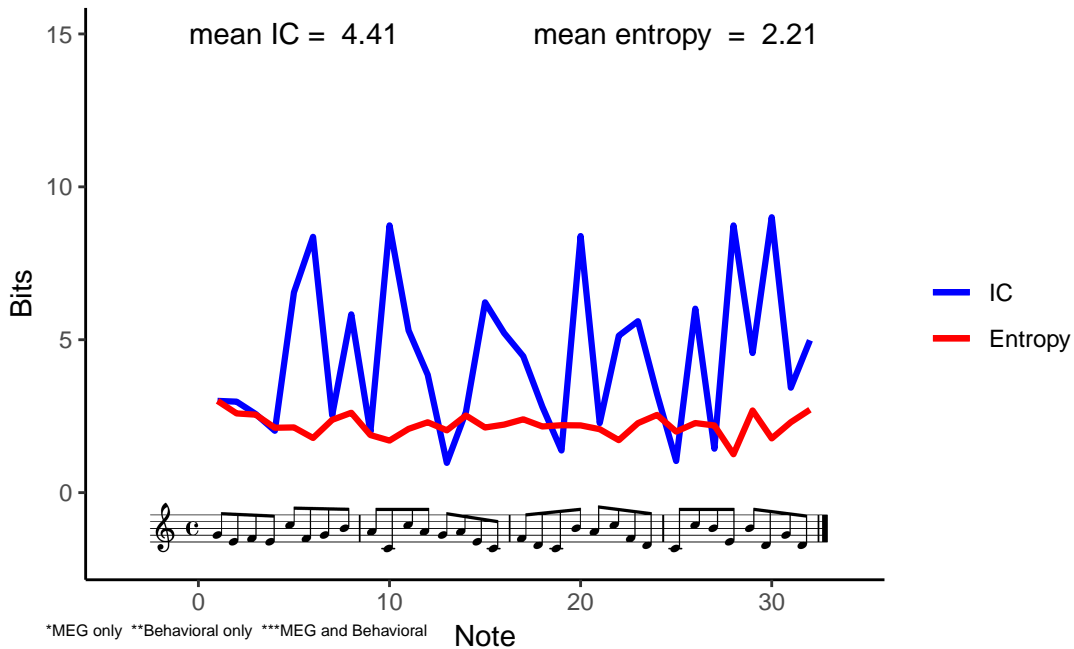

\*MEG only \*\*Behavioral only \*\*\*MEG and Behavioral

Note



# IE3-8\*\*

mean IC = 4.96

mean entropy = 2.21

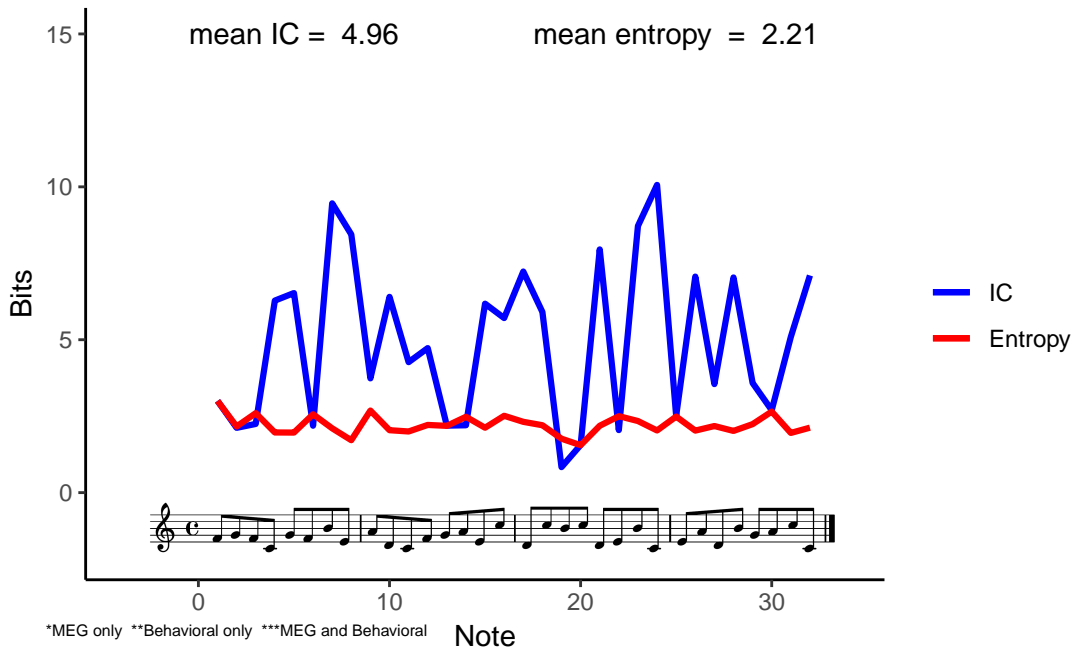

\*MEG only \*\*Behavioral only \*\*\*MEG and Behavioral

Note

# IE3-9\*\*

mean IC = 3.71

mean entropy = 2.2

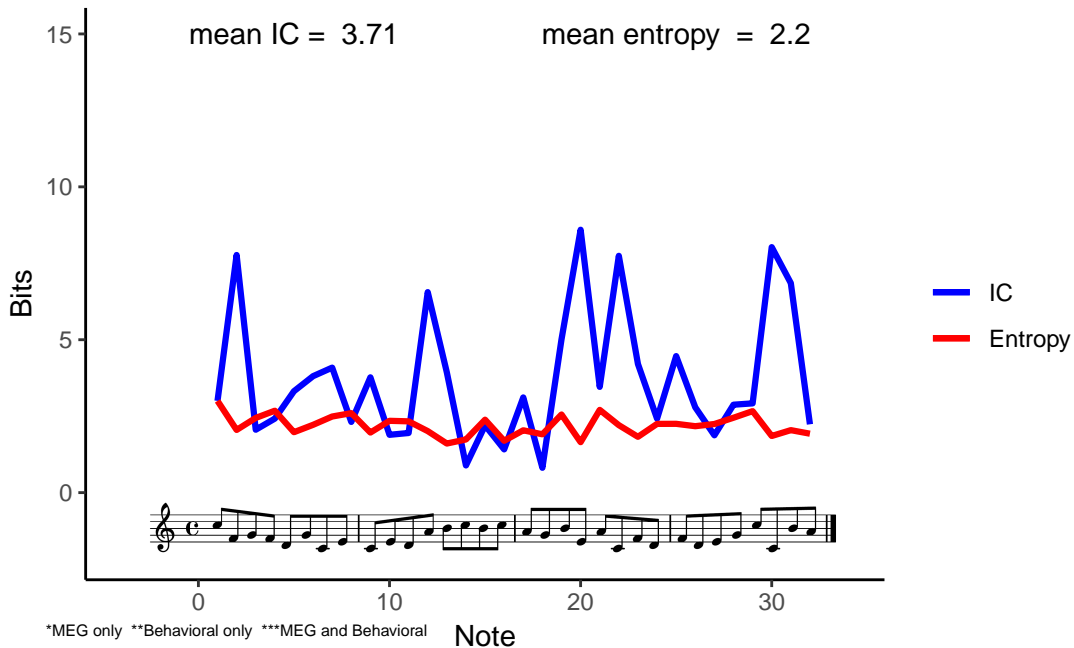

# IE3-10\*\*

mean IC = 4.48

mean entropy = 2.15

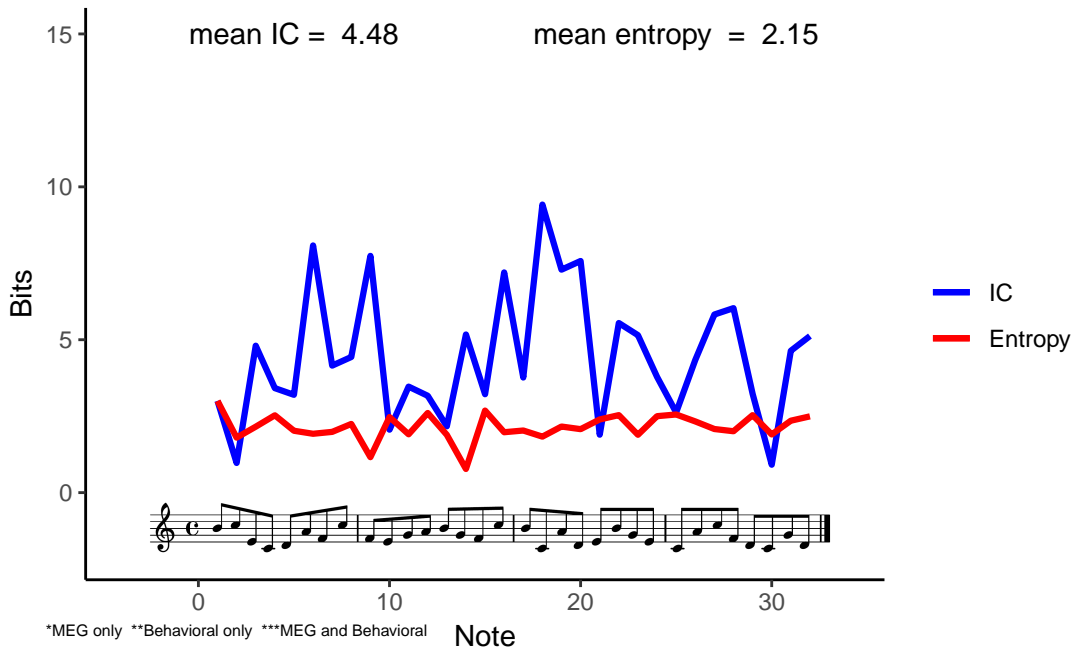

\*MEG only \*\*Behavioral only \*\*\*MEG and Behavioral

Note

# HE-1\*\*\*

mean IC = 2.9

mean entropy = 2.47

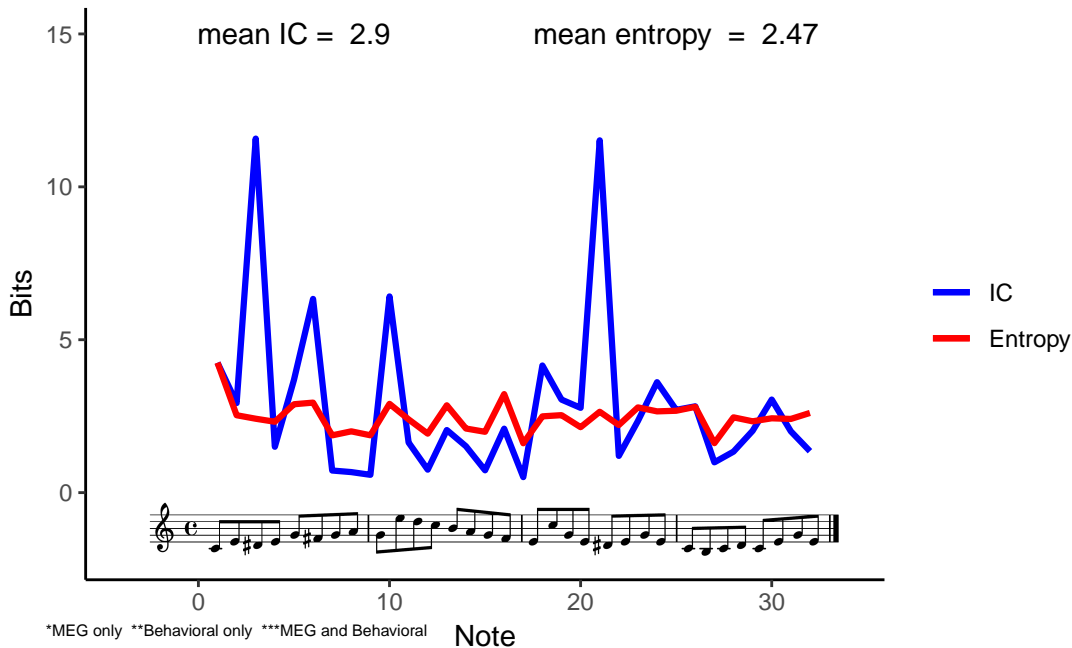

\*MEG only \*\*Behavioral only \*\*\*MEG and Behavioral

Note

# HE-2\*\*\*

mean IC = 2.33

mean entropy = 2.43

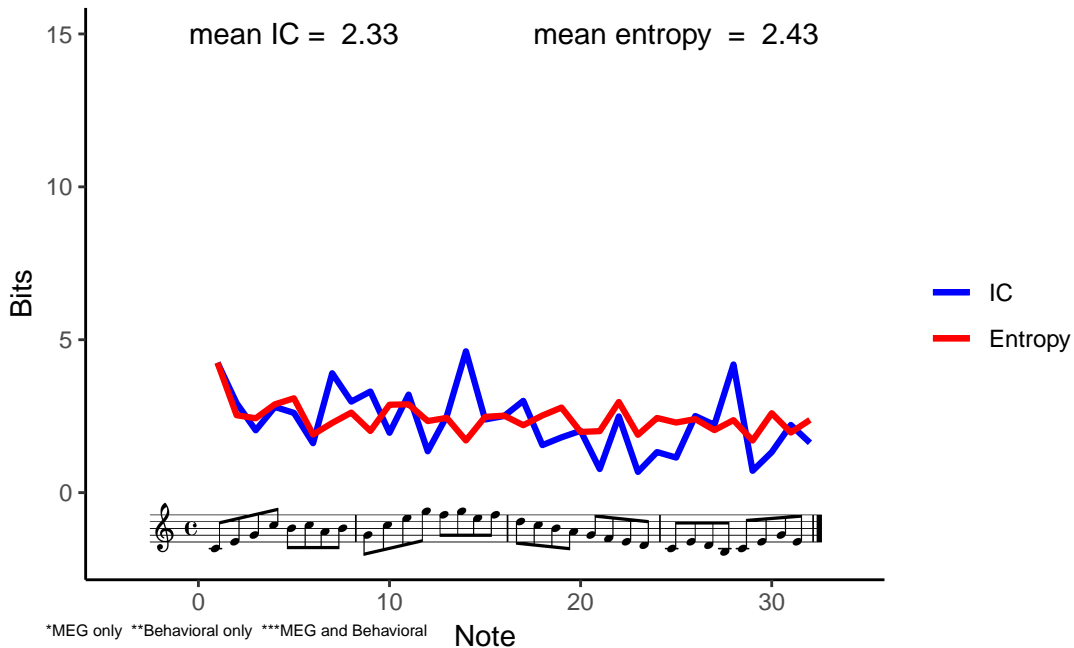

\*MEG only \*\*Behavioral only \*\*\*MEG and Behavioral

Note

# HE-3\*\*\*

mean IC = 2.56

mean entropy = 2.35

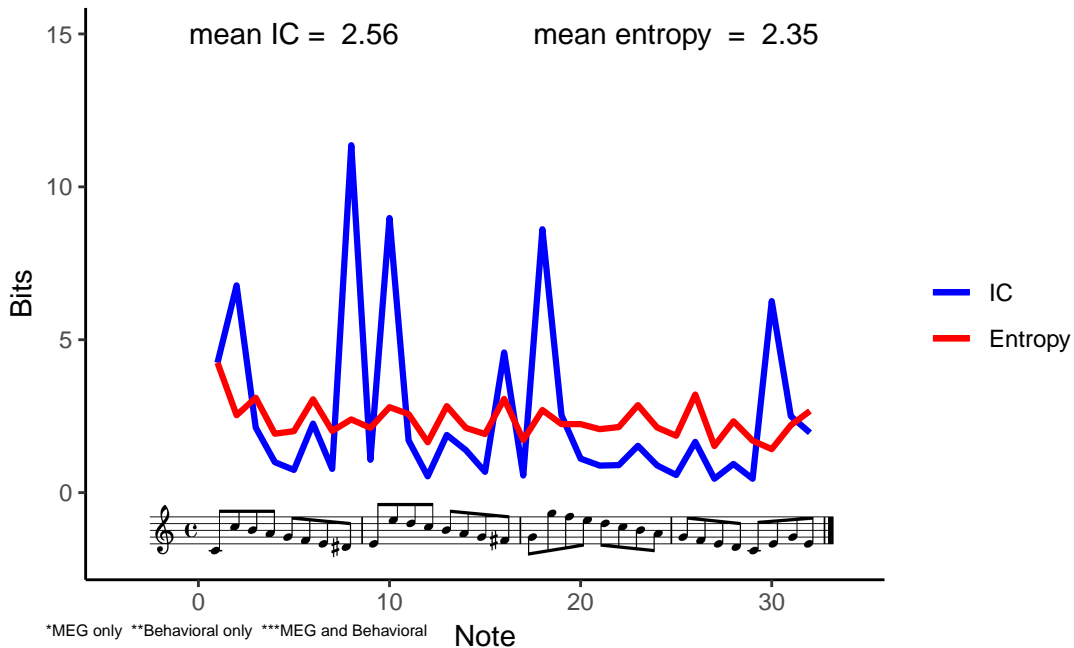

\*MEG only \*\*Behavioral only \*\*\*MEG and Behavioral

Note

# HE-4\*\*\*

mean IC = 2.26

mean entropy = 2.41

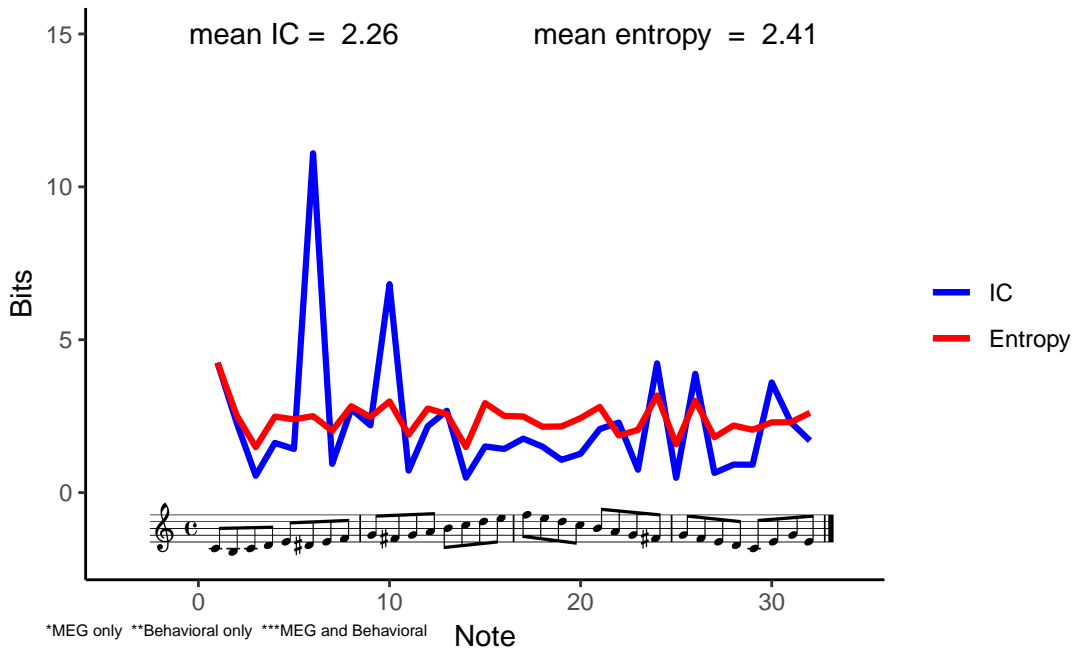

\*MEG only \*\*Behavioral only \*\*\*MEG and Behavioral

Note

# HE-5\*\*\*

mean IC = 2.43

mean entropy = 2.43

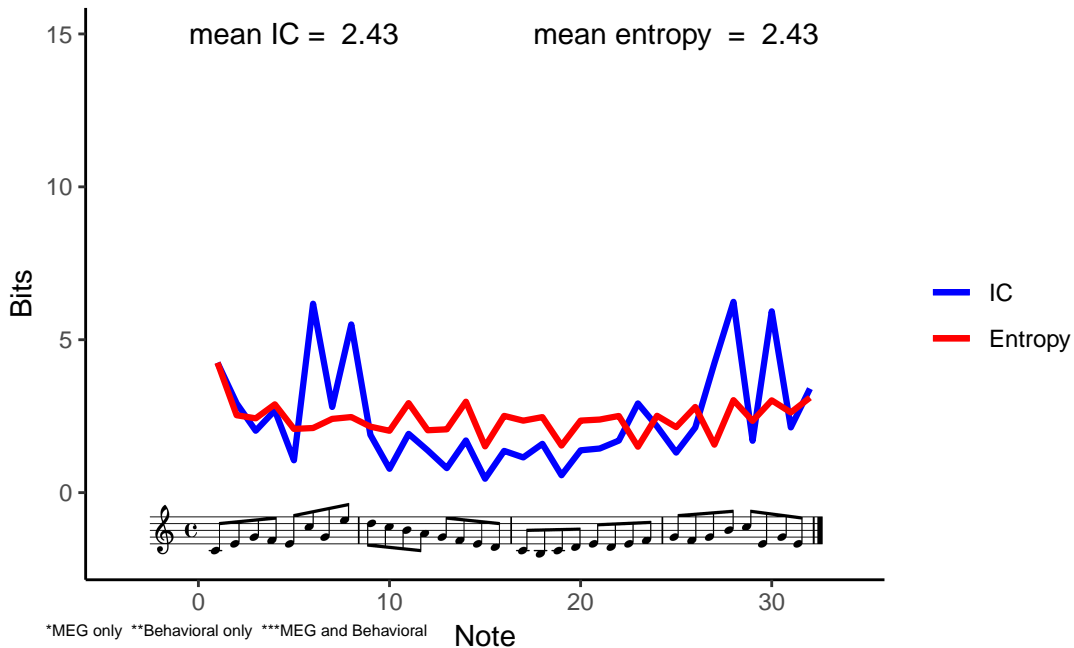

\*MEG only \*\*Behavioral only \*\*\*MEG and Behavioral

Note



# HE-6\*\*\*

mean IC = 2.56

mean entropy = 2.52

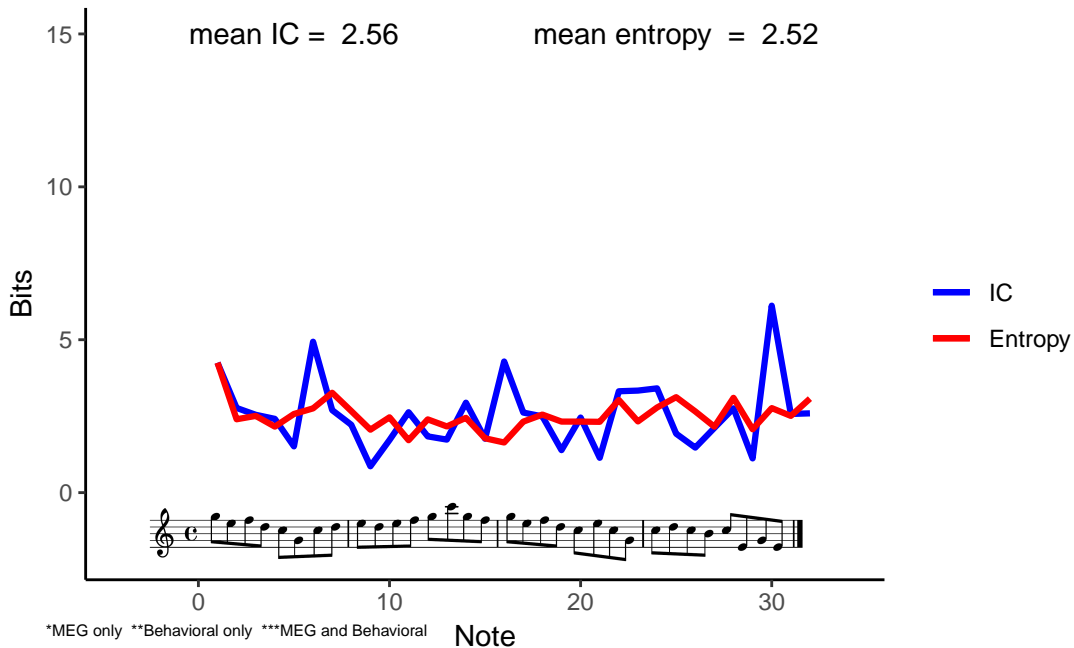

\*MEG only \*\*Behavioral only \*\*\*MEG and Behavioral

Note

# HE-7\*

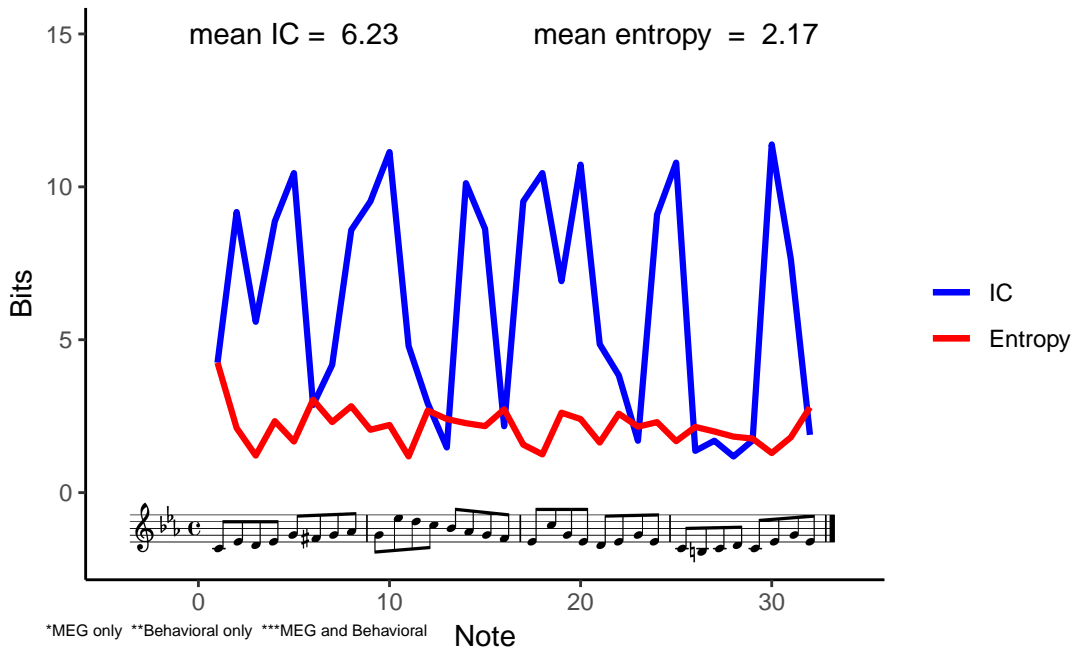

# HE-8\*

mean IC = 4.87

mean entropy = 2.16

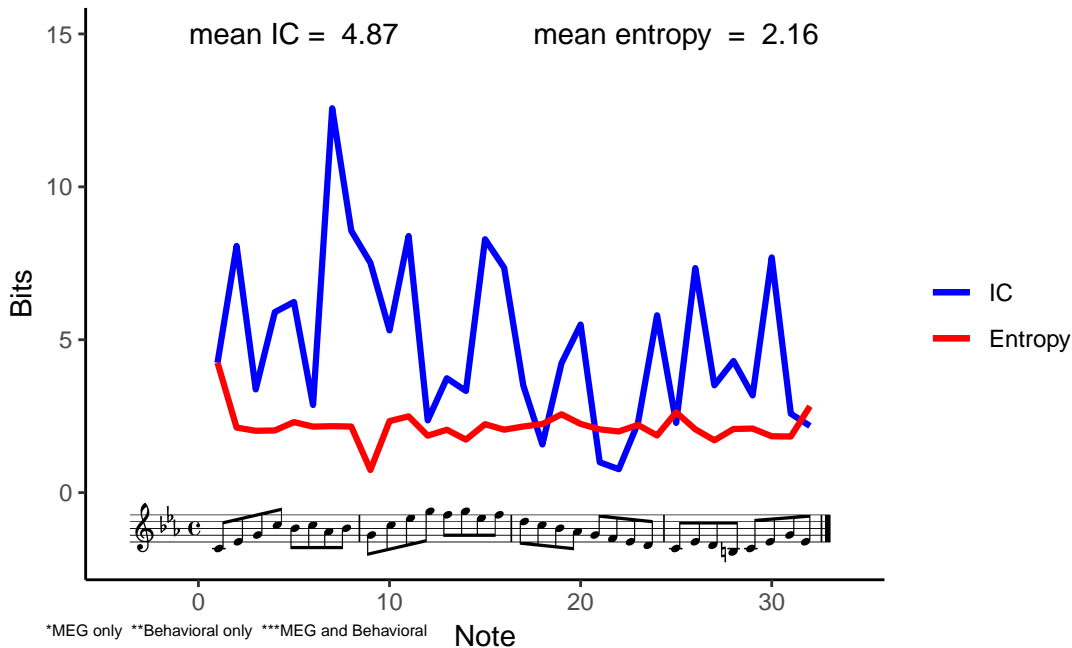

\*MEG only \*\*Behavioral only \*\*\*MEG and Behavioral

Note

# HE-9\*

mean IC = 2.94

mean entropy = 2.17

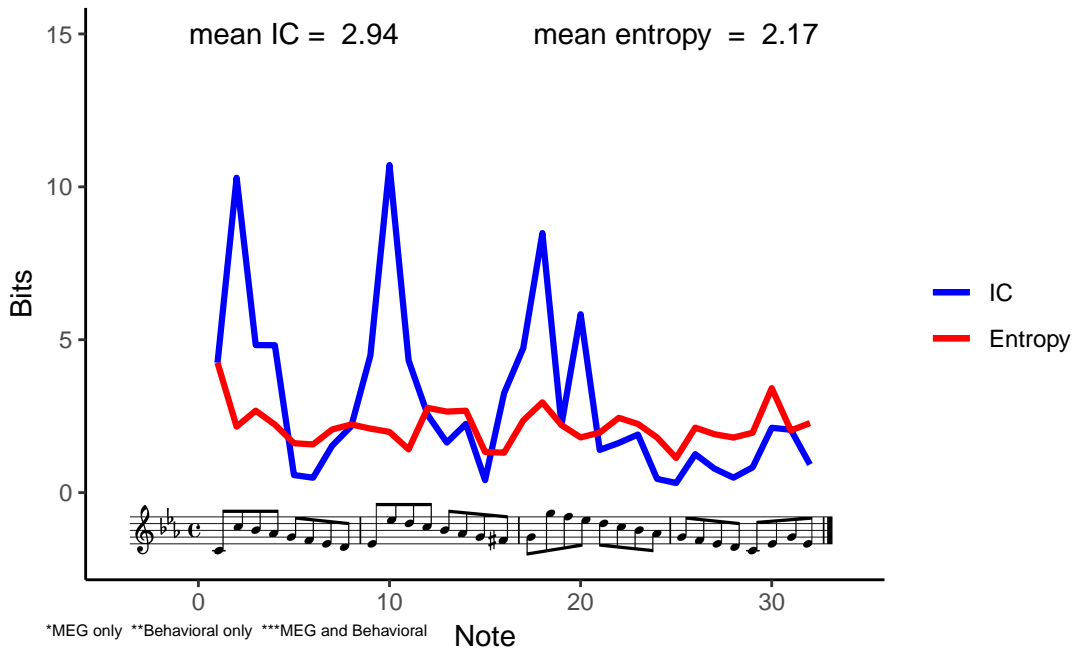

\*MEG only \*\*Behavioral only \*\*\*MEG and Behavioral

Note

# HE-10\*

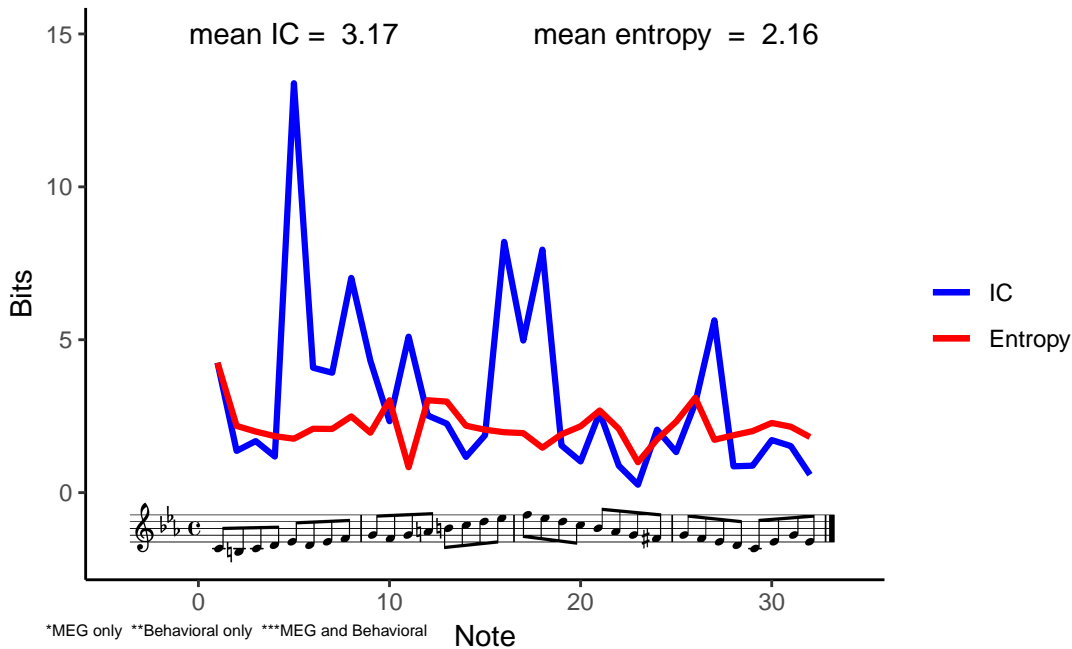

# HE-11\*

mean IC = 2.91

mean entropy = 2.09

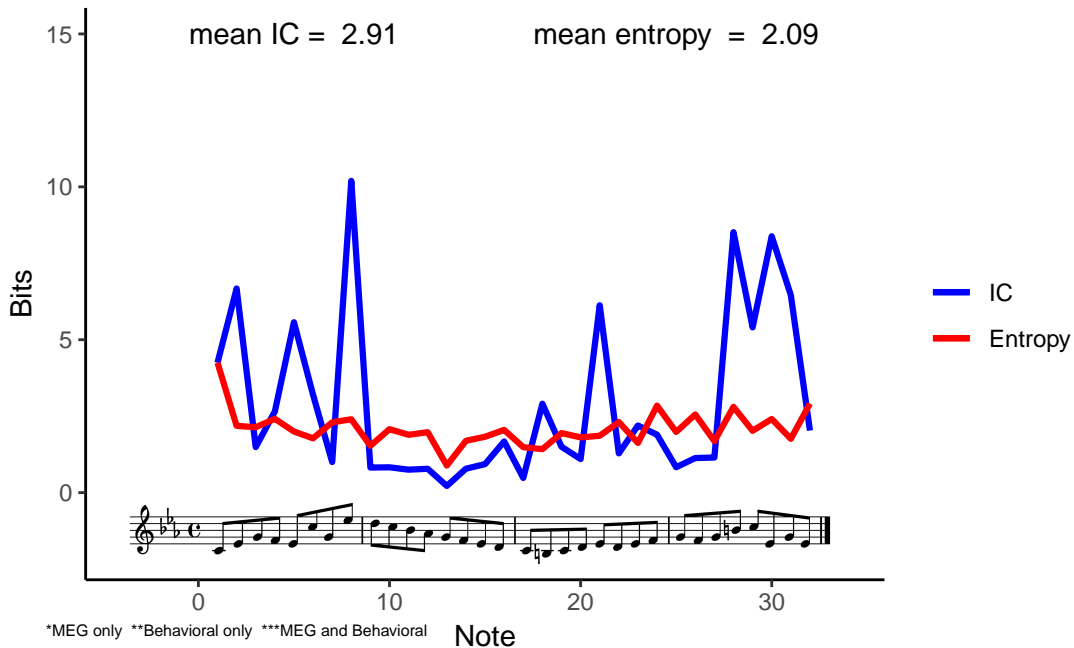

\*MEG only \*\*Behavioral only \*\*\*MEG and Behavioral

# HE-12\*

mean IC = 3.46

mean entropy = 2.09

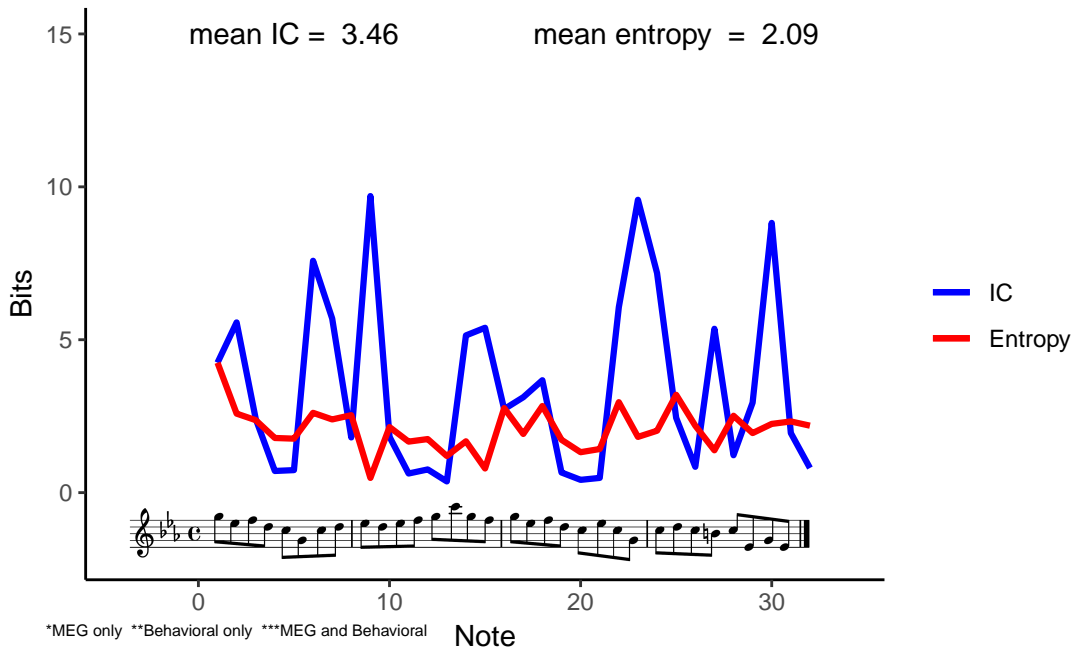

\*MEG only \*\*Behavioral only \*\*\*MEG and Behavioral

Note
