# Supplementary material for: Reduced prediction error responses in high- as compared to low-uncertainty musical contexts
Source: bioRxiv or medRxiv preprint supplement (doi:10.1101/422949), 2019-06-13

# Interval distributions (in semitones) for different conditions

## LE

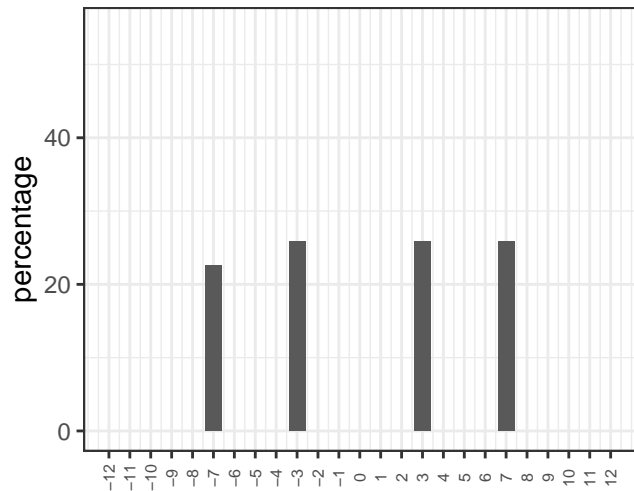

## IE1

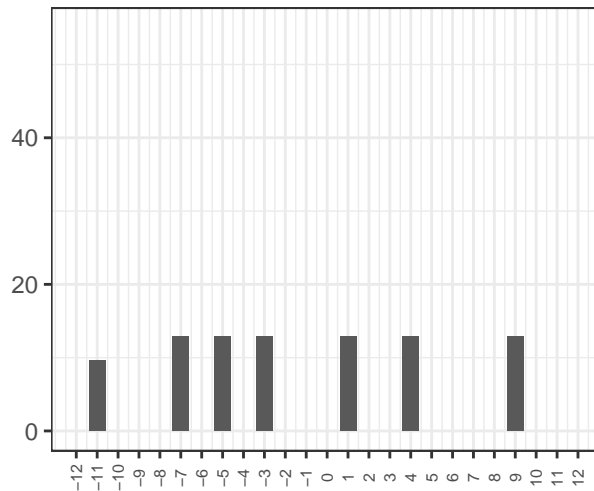

## IE2

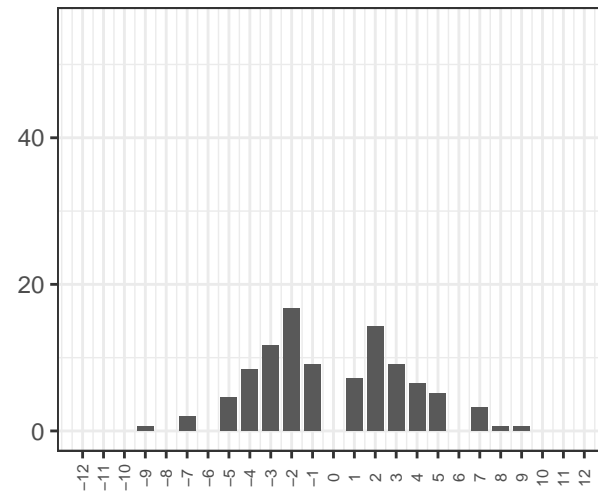

## IE3

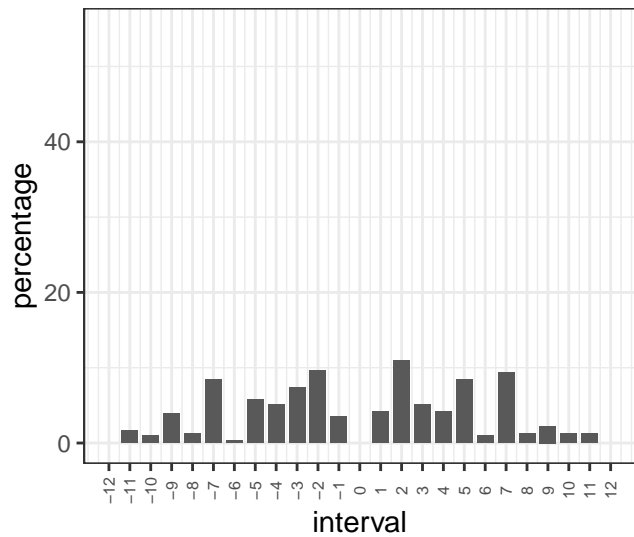

## HE

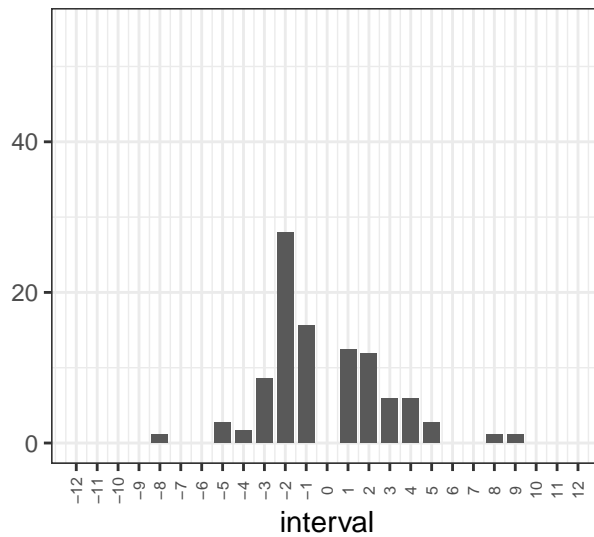

## MEG experiment

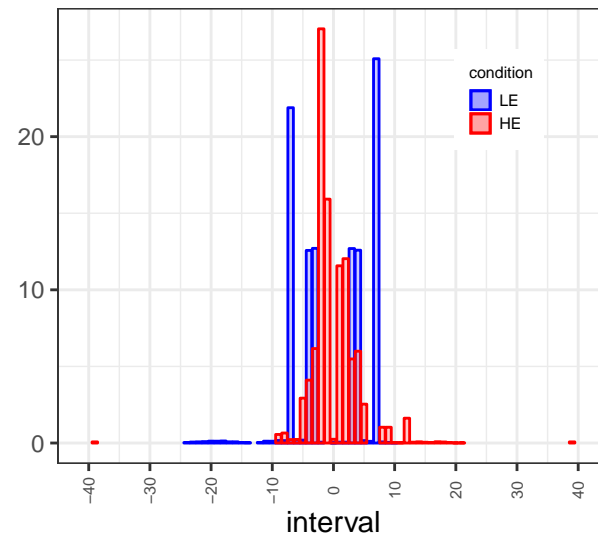

Supplement: Supplementary file [file media-4.pdf]
