# Supplementary material for: Reduced prediction error responses in high- as compared to low-uncertainty musical contexts
Source: bioRxiv or medRxiv preprint supplement (doi:10.1101/422949), 2019-06-13
Supplement: Supplementary file [file media-5.pdf]

Adjusted and unadjusted IDyOM estimates for MEG (A,C) and behavioral (B,D) experiments

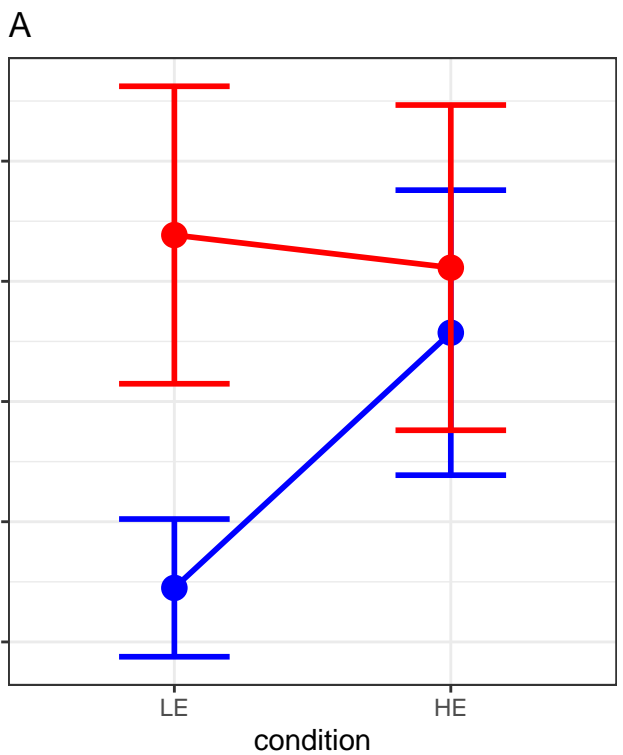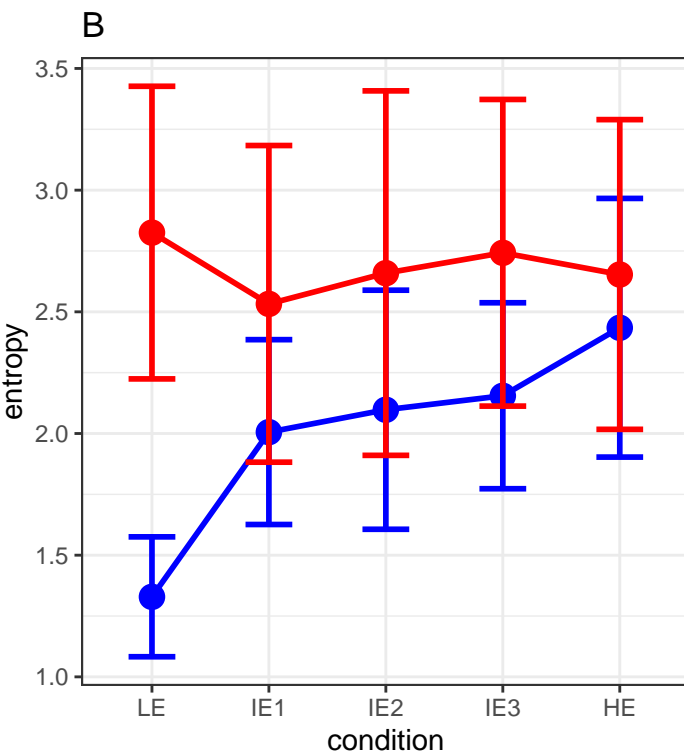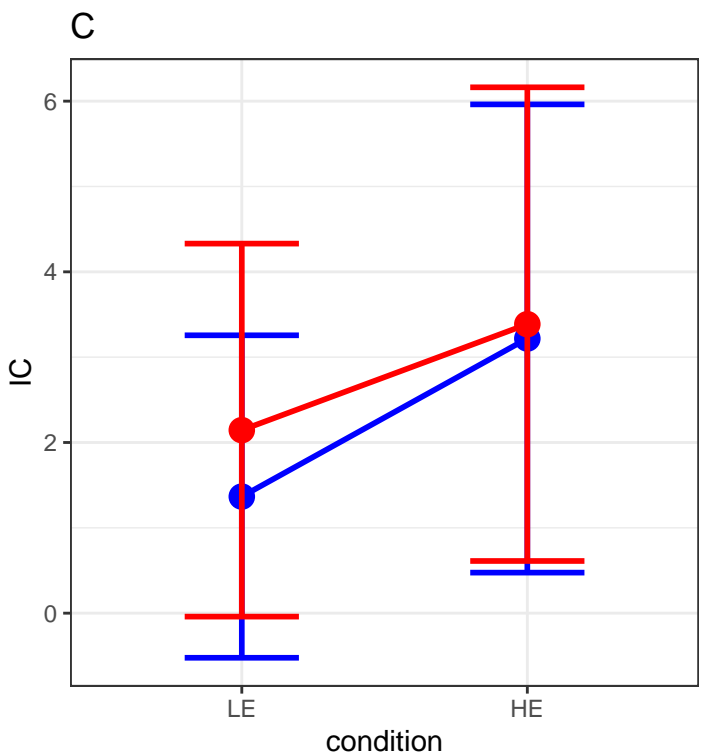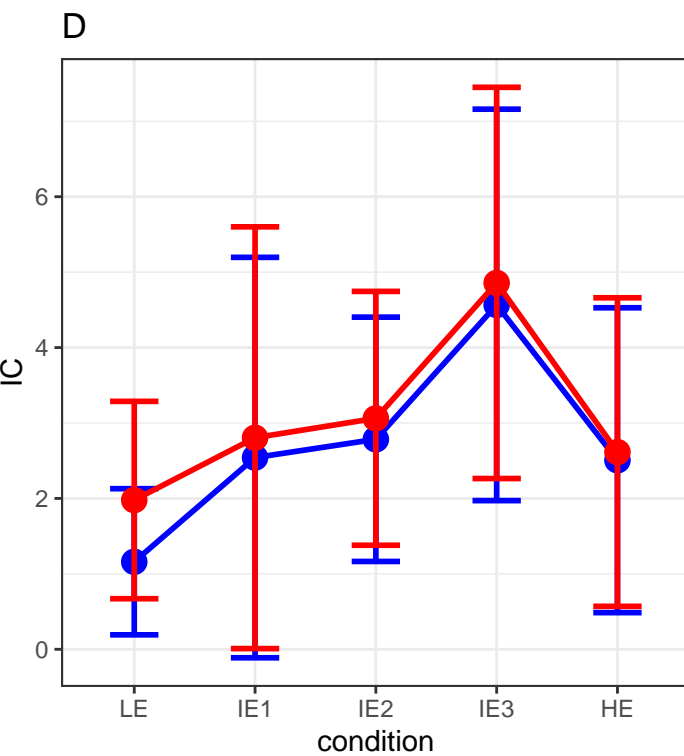

— adjusted — unadjusted
